# Supplementary material for: Stepwise enhancement of fluorescence induced by anion coordination and non-covalent interactions
Source: Royal Society of Chemistry journal article supplement (doi:10.1039/d0dt03788e), 2020-12-09
Supplement: d0dt03788e1.pdf [file d0dt03788e1.pdf]

Electronic Supplementary Information

**Stepwise Enhancement of Fluorescence Induced by Anion  
Coordination and Guest Molecule Interaction**

Dan Zhang,<sup>‡a</sup> Jie Zhao,<sup>‡a</sup> Liping Cao,<sup>\*a</sup> Dong Yang,<sup>a</sup> Bozhong Chen,<sup>a</sup> Le Yu,<sup>a</sup> Xiao-Juan Yang<sup>a</sup>  
and Biao Wu<sup>\*a</sup>

<sup>a</sup> Key Laboratory of Synthetic and Natural Functional Molecule Chemistry of the Ministry of Education,  
College of Chemistry and Materials Science, Northwest University, Xi'an 710127, China. E-mail:  
[chcaoliping@nwu.edu.cn](mailto:chcaoliping@nwu.edu.cn); [wubiao@nwu.edu.cn](mailto:wubiao@nwu.edu.cn)

<sup>‡</sup> These authors contributed equally to this work.

---

**Table of Contents:**

- S1.** General considerations
  - S2.** Synthesis of ligands **L** and complex **1**
  - S3.** X-ray crystallography
  - S4.** NMR spectroscopy
  - S5.** High-resolution MS studies
  - S6.** UV-Vis and Fluorescence spectra
  - S7.** Density Functional Theory (DFT) computations
-

## Experimental Procedures

### S1. General considerations

*o*-Nitrophenylisocyanate, *p*-tolyl isocyanate isocyanate and 4-Aminobenzophenone were purchased from Alfa Aesar. All solvents and other reagents were of reagent grade quality and purchased commercially. All NMR spectra were recorded on a Varian unity INOVA-400 or Bruker AVANCE III-400 MHz spectrometer. Mass spectra were performed with a Bruker micrOTOF-Q II (Germany). Fluorescence spectra were recorded by a Hitachi F-4500 (Tokyo, Japan).

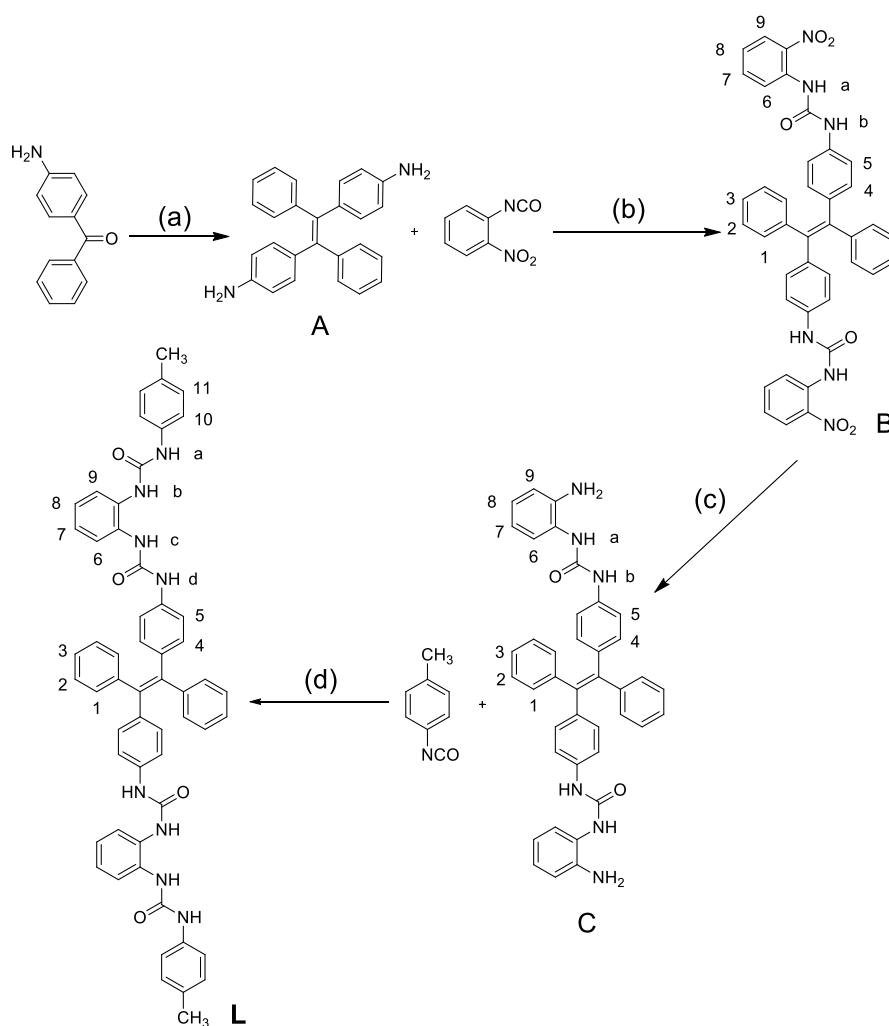

**Scheme S1** Synthesis of ligand L. (a) zinc powder,  $\text{TiCl}_4$ , THF, reflux; (b) 2-nitrophenyl isocyanate,  $\text{CH}_2\text{Cl}_2$ , reflux; (c)  $\text{NH}_2\text{NH}_2 \cdot \text{H}_2\text{O}$ , Pd/C 10% cat., EtOH, reflux; (d) *p*-tolyl isocyanate, THF/DMF, reflux.

## S2. Synthesis of ligands L and complex 1

### S2.1 Compound A

Compound A were synthesized according to the literature procedures.<sup>1</sup>

### S2.2 Compound B

CH<sub>2</sub>Cl<sub>2</sub> solution (30 mL) of compound A (1.09 g, 3.0 mmol) was added to a CH<sub>2</sub>Cl<sub>2</sub> solution (20 mL) of *o*-nitrophenylisocyanate (1.20 g, 7.5 mmol). After refluxing under intense stirring for 3 h, the formed precipitate was filtered off and washed several times with CH<sub>2</sub>Cl<sub>2</sub> and diethyl ether, and then dried in vacuum to yield analytically pure B as an orange-yellow solid (1.78 g, 86%). <sup>1</sup>H NMR (400 MHz, [D<sub>6</sub>]DMSO, ppm): δ 9.79 (s, 2H, NHa), 9.56 (s, 2H, NHb), 8.25 (d, *J* = 8.0 Hz, 2H, H9), 8.08 (d, *J* = 8.0 Hz, 2H, H6), 7.68 (t, 2H, H8), 7.25 (d, *J* = 8.0 Hz, 4H, H5), 7.12-7.21 (8H, H3/H4/H7), 7.01 (d, *J* = 8.0 Hz, 4H, H2), 6.87 (d, *J* = 8.0 Hz, 4H, H1). <sup>13</sup>C NMR (100 MHz, [D<sub>6</sub>]DMSO): 151.6 (CO), 143.6, 139.7, 137.6, 137.5, 135.0, 134.8, 131.4, 130.8, 127.9, 126.5, 125.4, 122.6, 122.3, 117.8. ESI-MS: *m/z* 713.2 [M+Na]<sup>+</sup>.

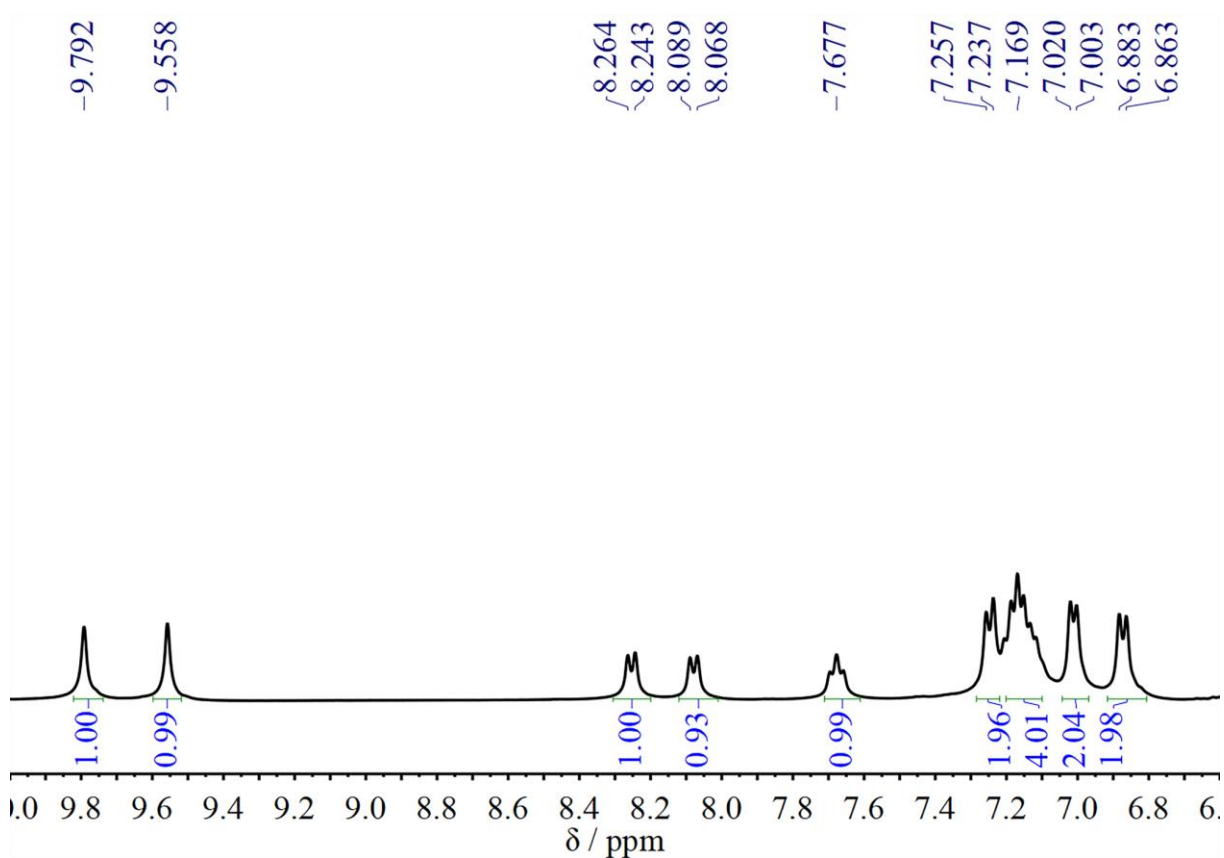

Fig. S1 <sup>1</sup>H NMR spectra of compound B.

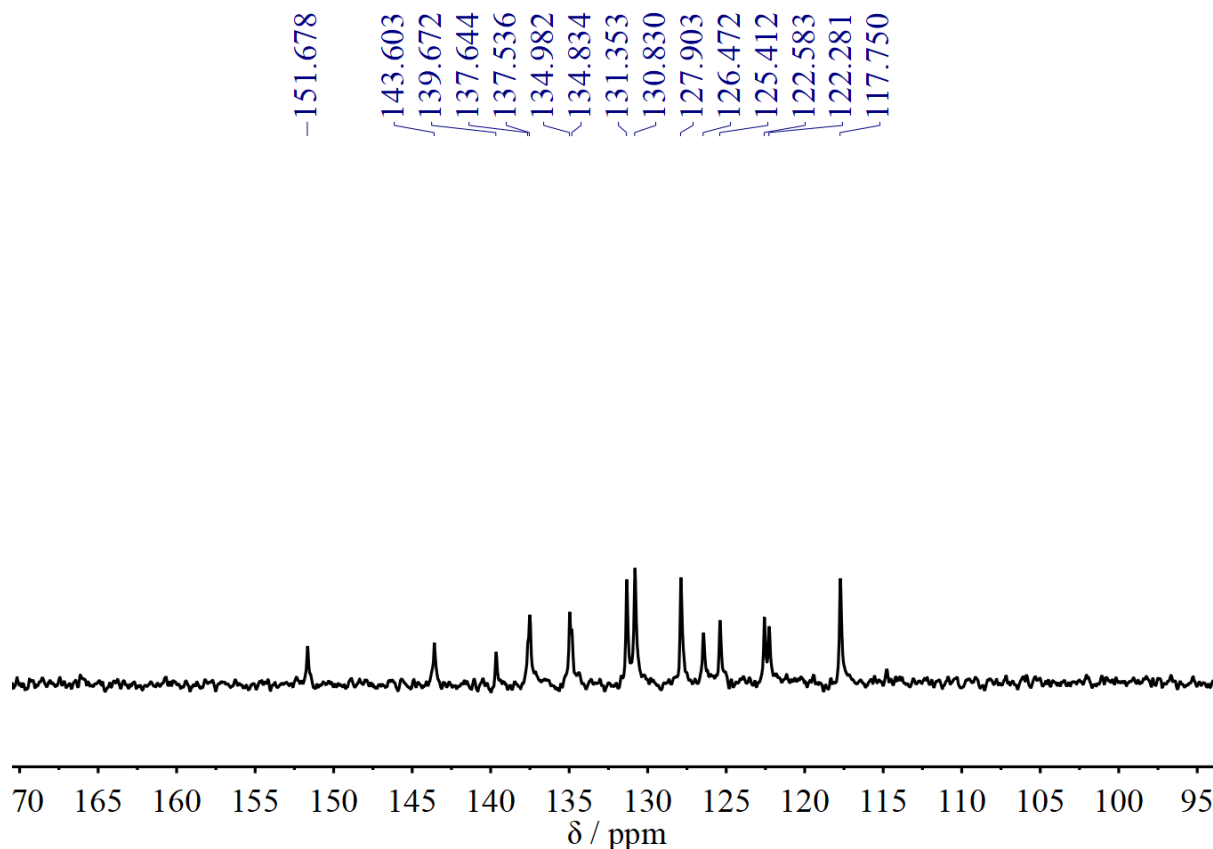

**Fig. S2**  $^{13}\text{C}$  NMR spectra of compound **B**.

### S2.3 Compound C

Ethanol solution (5 mL) of hydrazine monohydrate (0.53 mL) was added dropwise to the suspension of **B** (0.60 g, 0.87 mmol) and Pd/C 10% (0.06 g, cat.) in ethanol (30 mL). After refluxing under intense stirring for 24 h, the solid was filtered off via suction filtration and then dissolved in DMF (5 mL) and filtered through Celite to remove Pd/C. The DMF solution was poured in water (200 mL), and the precipitate thus obtained was filtered off, washed several times with diethyl ether and dried over vacuum to give analytically pure **C** as a yellowish white solid (0.42 g, 77 %).  $^1\text{H}$  NMR (400 MHz,  $[\text{D}_6]\text{DMSO}$ , ppm):  $\delta$  8.71 (s, 2H, NHb), 7.68 (s, 2H, NHa), 7.30 (d,  $J = 8.0$  Hz, 2H, H6), 7.11-7.21 (10H, H4/5/7), 7.01 (d,  $J = 4.0$  Hz, 4H, H2), 6.83 (6H, H1/H3), 6.73 (d,  $J = 4.0$  Hz, 2H, H9), 6.56 (t, 2H, H8), 4.76 (s, 4H,  $\text{NH}_2$ ).  $^{13}\text{C}$  NMR (100 MHz,  $[\text{D}_6]\text{DMSO}$ ): 153.0 (CO), 143.8, 141.0, 139.5, 138.4, 136.5, 131.3, 130.8, 127.8, 126.4, 124.6, 124.5, 123.8, 117.1, 116.8, 115.9.

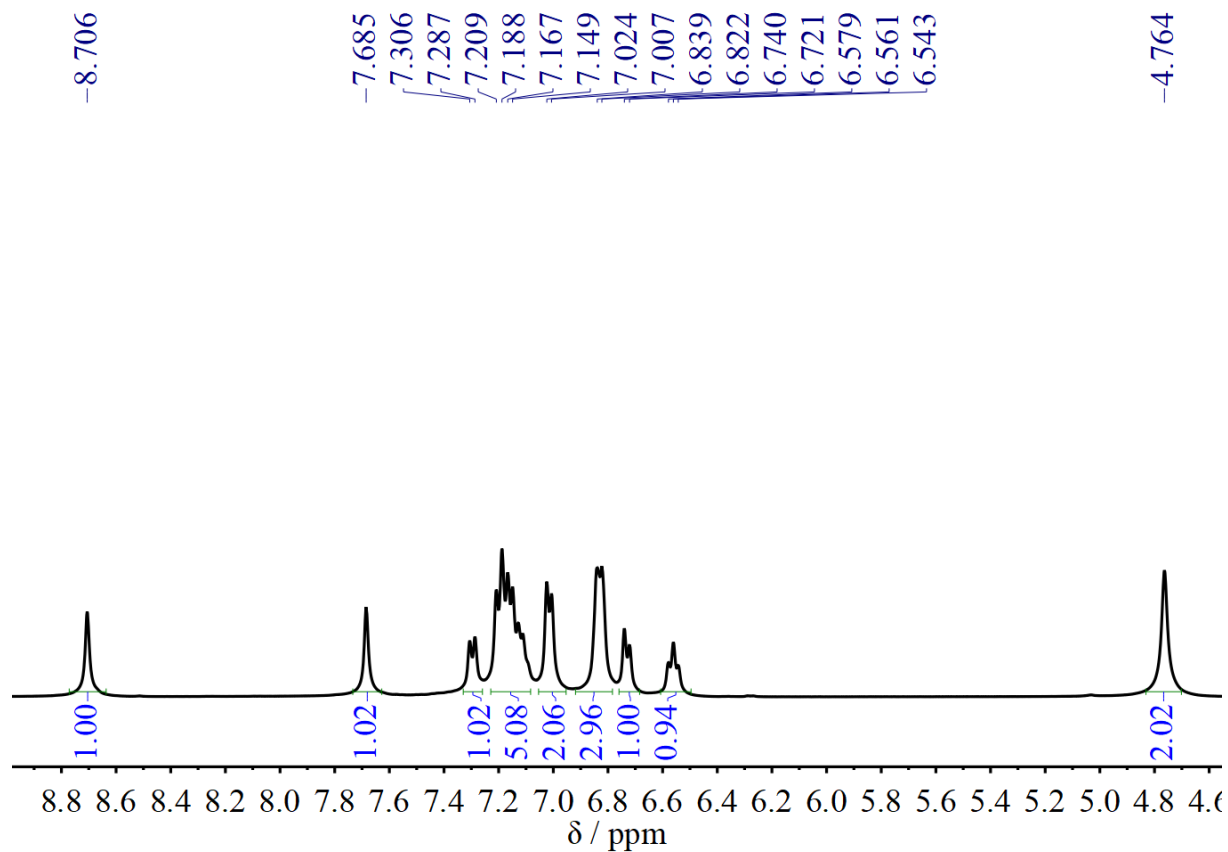

Fig. S3  $^1\text{H}$  NMR spectra of compound C.

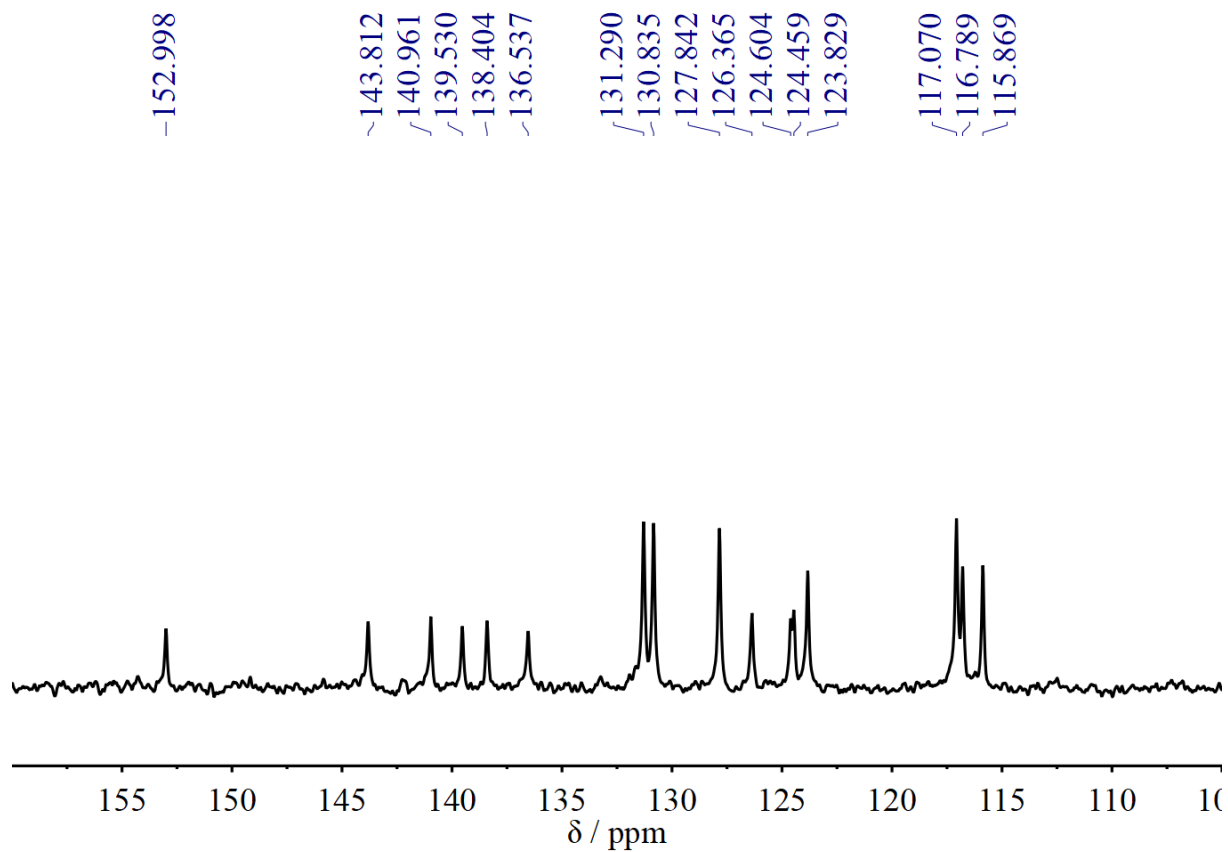

Fig. S4  $^{13}\text{C}$  NMR spectra of compound C.

## S2.4 L

Compound **C** (0.76 g, 1.2 mmol) was dissolved in 10 mL DMF and the solution was added dropwise into 10 mL refluxing THF solution of *p*-tolyl isocyanate (454  $\mu$ l, 3.6 mmol). The mixture was refluxed for 12 h, and the solvent was removed under reduced pressure and poured into 100 mL toluene. The precipitate was filtered off and washed several times with diethyl ether and then dried over vacuum to give **L** as a yellow solid (0.88 g, 82%).  $^1\text{H}$  NMR (400 MHz,  $[\text{D}_6]\text{DMSO}$ , ppm):  $\delta$  9.02 (s, 2H, NHd), 8.96 (s, 2H, NHc), 8.02 (s, 2H, NHb), 7.98 (s, 2H, NHa), 7.58 (d,  $J = 8.0$  Hz, 2H, H6), 7.52 (d,  $J = 8.0$  Hz, 2H, H9), 7.34 (d,  $J = 8.0$  Hz, 4H, H5), 7.21 (d,  $J = 8.0$  Hz, 4H, H10), 7.05-7.16 (14H, H1/ H2/ H3/ H7/ H8), 7.01 (d,  $J = 8.0$  Hz, 4H, H4), 6.82 (d,  $J = 8.0$  Hz, 4H, H11), 2.23 (s, 6H,  $\text{CH}_3$ ).  $^{13}\text{C}$  NMR (100 MHz,  $[\text{D}_6]\text{DMSO}$ ): 153.3 (CO), 153.2 (CO), 143.8, 139.6, 138.2, 137.3, 136.8, 131.6, 131.3, 131.0, 130.9, 130.7, 129.3, 127.9, 126.5, 124.3, 124.2, 123.9, 118.4, 117.4, 20.4 ( $\text{CH}_3$ ).

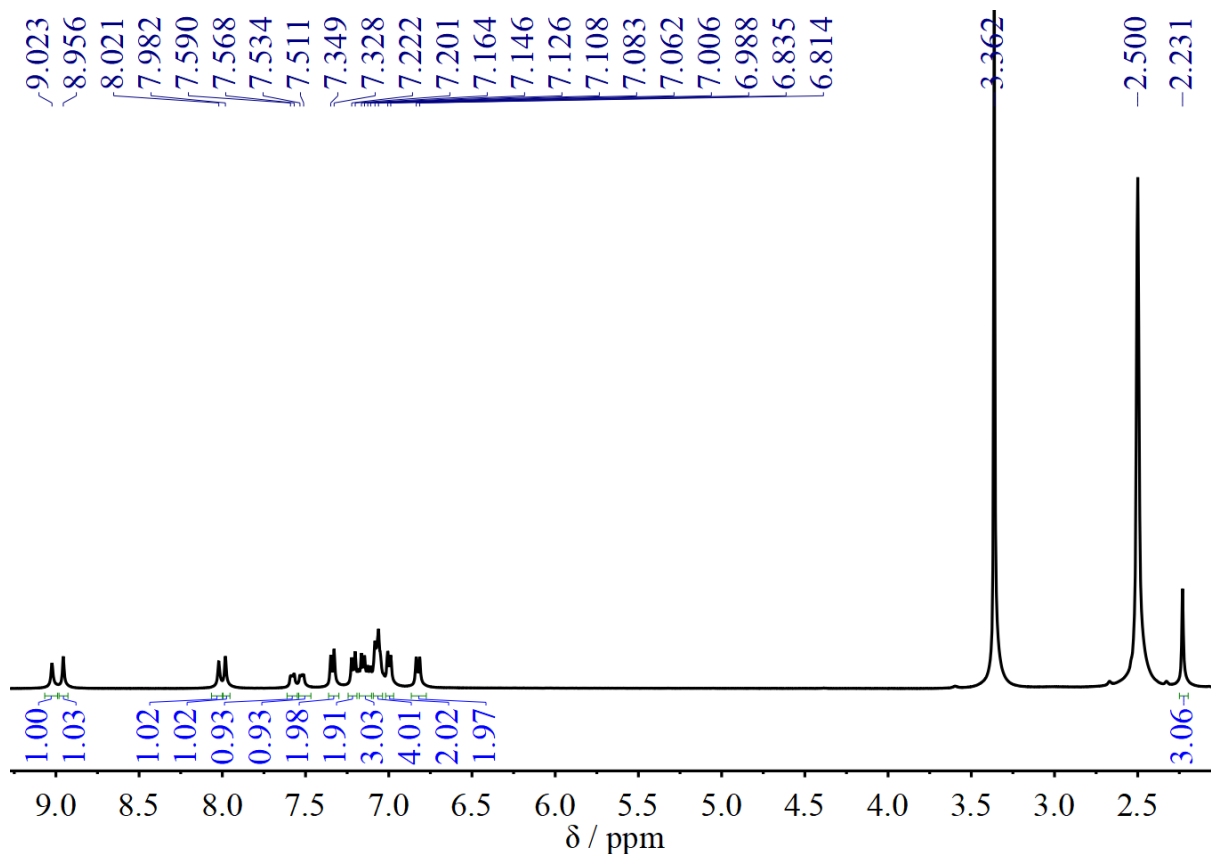

Fig. S5  $^1\text{H}$  NMR spectra of compound **L**.

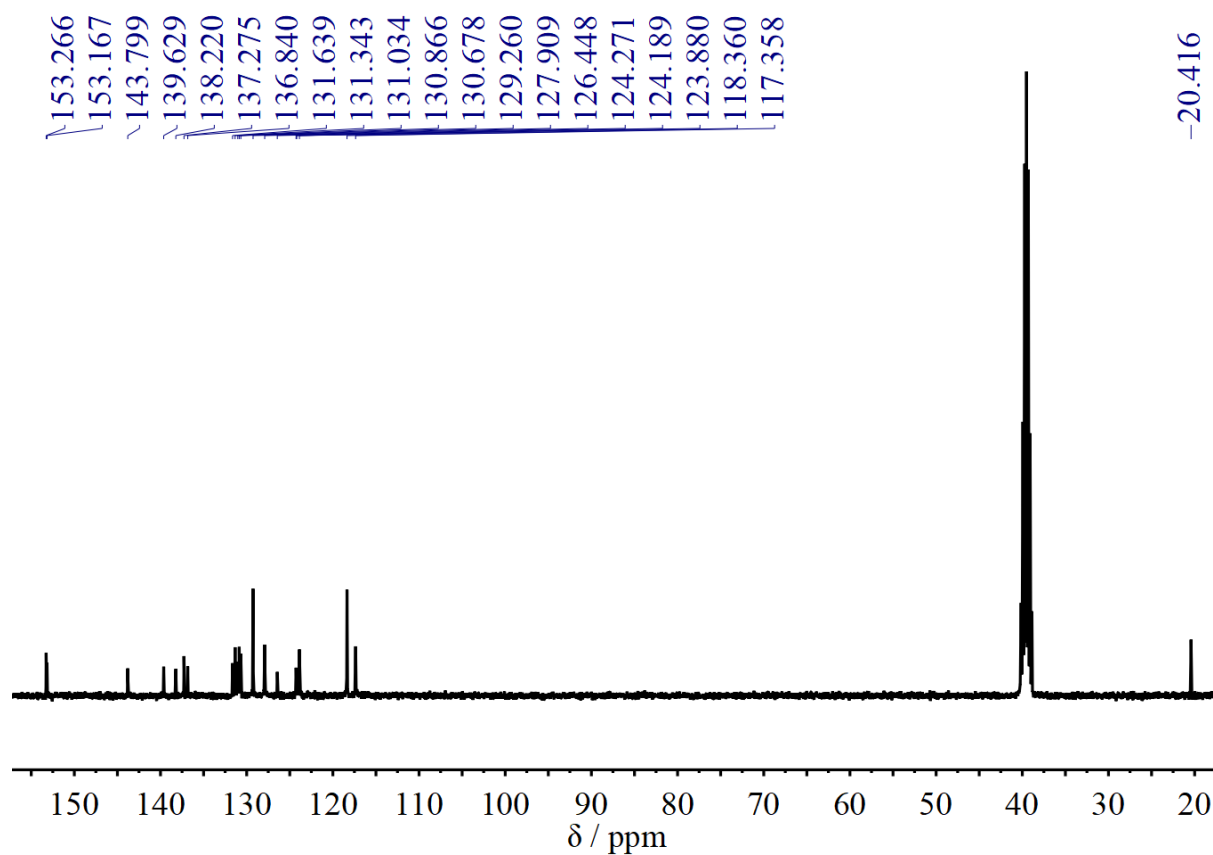

**Fig. S6**  $^{13}\text{C}$  NMR spectra of compound **L**.

### S2.5 $[\text{K}([\text{18}]\text{crown-6})_4(\text{HPO}_4)_2(\text{L})_2]$ (complex **1**)

22  $\mu\text{L}$   $\text{PO}_4^{3-}$  (0.5 mol/L, generated in situ by mixing  $\text{K}_3\text{PO}_4$ , and [18]crown-6 in water was added to a solution of **L** (10 mg, 0.011 mmol) in acetone (1 mL). After stirring overnight at room temperature, a clear light yellow solution was obtained. Slow vapor diffusion of diethyl ether into this solution afforded light-yellow crystals of complex **1** within two weeks.  $^1\text{H}$  NMR (400 MHz,  $[\text{D}_6]$ DMSO, ppm):  $\delta$  11.05 (s, 2H, NHd), 10.90 (s, 4H, NHb/c), 10.17 (s, 2H, NHa), 7.85 (d, 4H, H6/9), 7.36 (d, 8H, H5/10), 7.16-7.04 (m, 10H, H1/2/3), 6.92 (d, 4H, H7/8), 6.68 (d, 8H, H4/11) 2.13 (s, 6H,  $\text{CH}_3$ ).

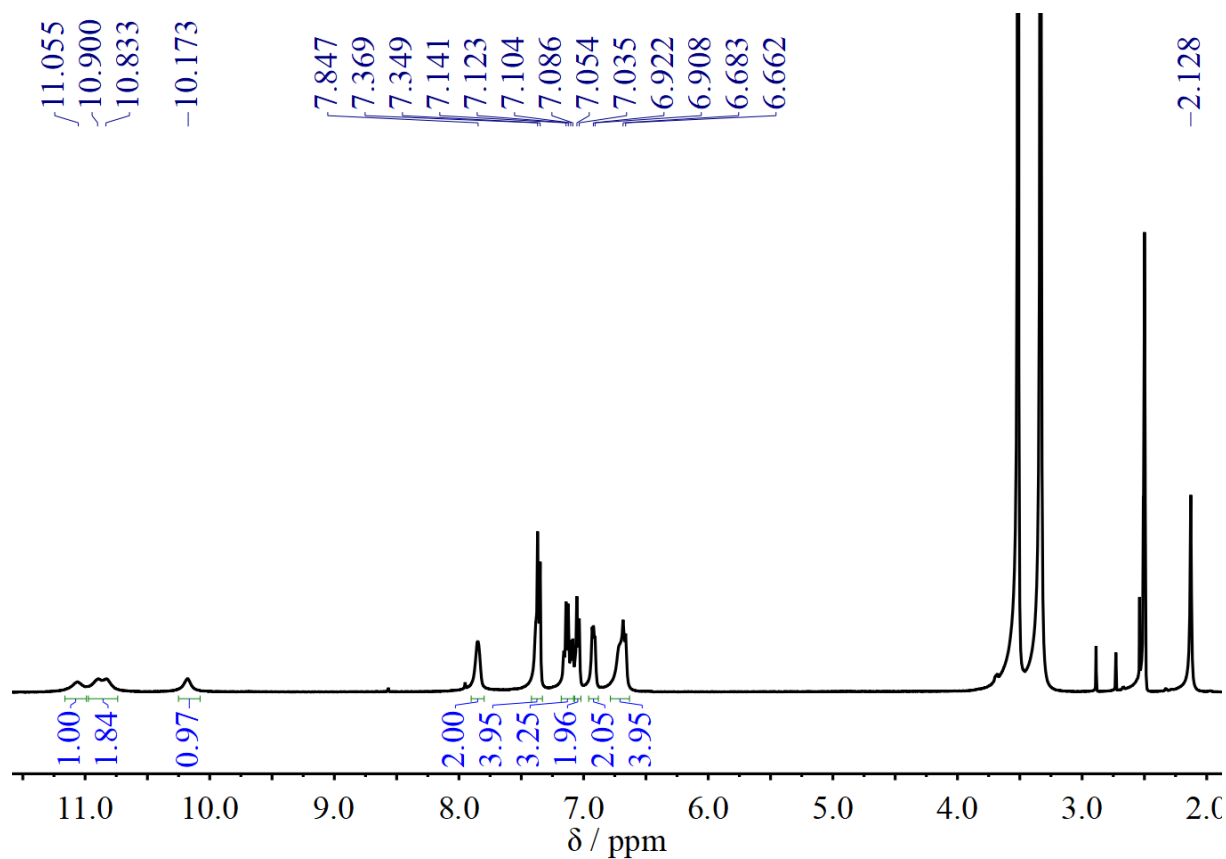

Fig. S7  $^1\text{H}$  NMR spectra of complex 1.

## S2.6 $[(\text{TBA})_4[(\text{SO}_4)_2(\text{L})_2]]$ (complex 2)

13  $\mu\text{L}$   $(\text{TBA})_2\text{SO}_4$  (aqueous solution, w/w 50%) was added to a solution of **L** (10 mg, 0.011 mmol) in acetone (1 mL). After stirring overnight at room temperature, a clear light yellow solution was obtained. Slow vapor diffusion of diethyl ether into this solution afforded light-yellow crystals of complex **2** within two weeks.  $^1\text{H}$  NMR (400 MHz,  $[\text{D}_6]$ DMSO, ppm):  $\delta$  9.74 (s, 4H, NHd/c), 9.56 (s, 2H, NHb), 9.15 (s, 2H, NHa), 7.95 (d, 2H, H6), 7.78 (d, 2H, H9), 7.35 (d, 4H, H5), 7.29 (d, 4H, H10), 7.15 (t, 4H, H7/8), 7.08 (t, 2H, H3), 7.00 (m, 8H, H1/2), 6.76 (d, 4H, H4), 6.72 (d, 4H, H11), 2.13 (s, 6H,  $\text{CH}_3$ ).



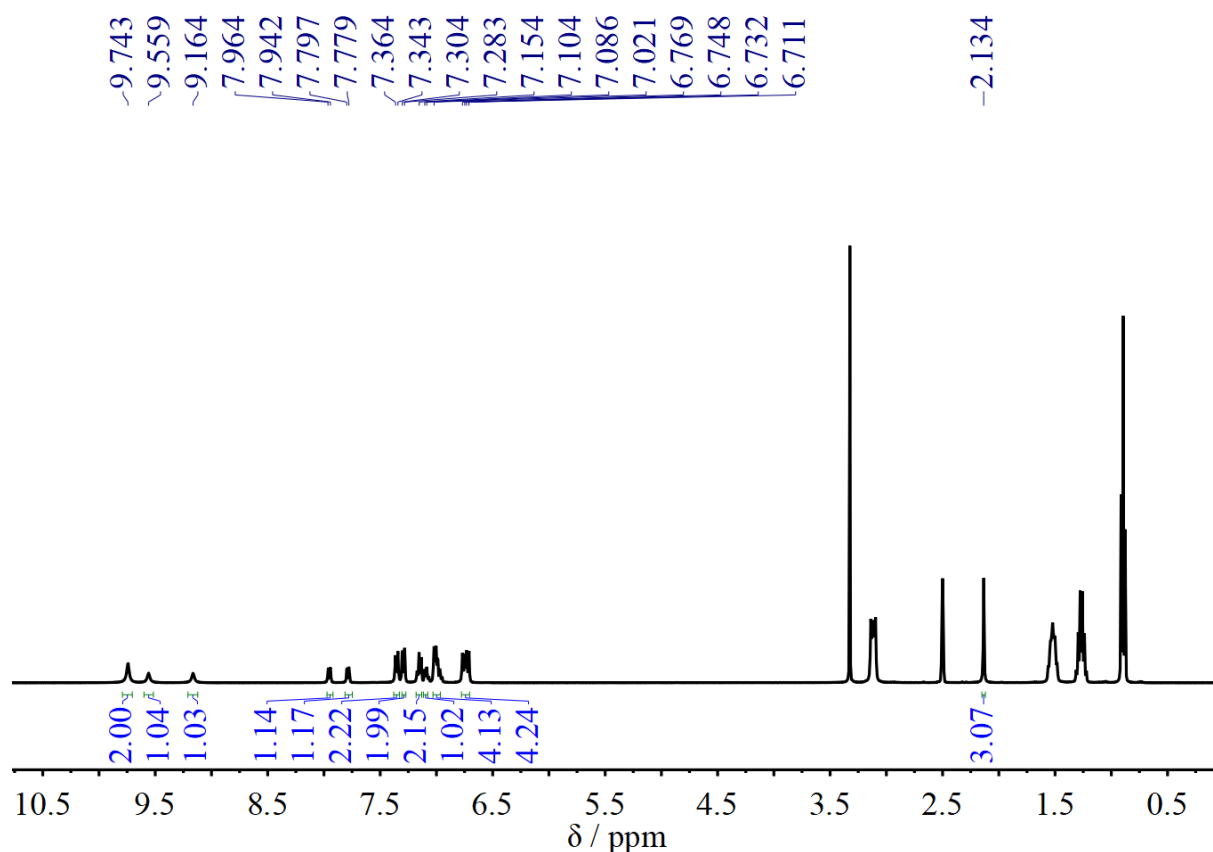

Fig. S8  $^1\text{H}$  NMR spectra of complex **2**.

### S3. X-ray crystallography

Diffraction data for complexes **1** and **2** were collected on a Bruker SMART APEX II diffractometer at 298 K (complex **1**) and 100 K (complex **2**) with graphite-monochromated Mo  $K\alpha$  radiation ( $\lambda = 0.71073 \text{ \AA}$ ). And complex **4** was collected with Bruker D8 Venture photon II, at low temperature (149.96 K) with Mo  $K\alpha$  radiation ( $\lambda = 0.71073 \text{ \AA}$ ). An empirical absorption correction using SADABS was applied for all data.<sup>2</sup> The structures were solved by direct methods using the SHELXS program. All non-hydrogen atoms were refined anisotropically by full-matrix least-squares on  $F^2$  using the SHELXL program and OLEX2 1.2.<sup>3</sup>

In complex **1**, severely disordered solvent molecules in the crystal lattice (about three diethyl ether, one acetone and two  $\text{H}_2\text{O}$  molecules per formula,  $Z = 2$ ), and the SQUEEZE command was employed in the refinement of the structure. Approximately 347 electron equivalents were removed from unit cell. In complex **4**, severely disordered solvent molecules in the crystal lattice (about one diethyl ether molecules per formula,  $Z = 4$ ), and the SQUEEZE command was employed in the refinement of the structure. Approximately 194 electron equivalents were removed from unit cell. Crystallographic data and refinement details for complex **1**, **2** and **4** are given in Table S1. CCDC 2025857 for  $[\text{K}([\text{18}]\text{crown-6})]_4[(\text{HPO}_4)_2(\text{L})_2]$  (**1**), 2025855 for

[TBA]<sub>4</sub>[(SO<sub>4</sub>)<sub>2</sub>(L)<sub>2</sub>] (**2**) and 2025856 for [(MV)LSO<sub>4</sub>]<sub>2</sub> (**4**). These data can be obtained free of charge from the Cambridge Crystallographic Data Centre [www.ccdc.cam.ac.uk/data\\_request/cif](http://www.ccdc.cam.ac.uk/data_request/cif).

**Table S1.** Crystal data and structure refinement of complexes **1**, **2** and **4**.

| Complex                                           | <b>1</b>                                                                        | <b>2</b>                                                          | <b>4</b>                                                                       |
|---------------------------------------------------|---------------------------------------------------------------------------------|-------------------------------------------------------------------|--------------------------------------------------------------------------------|
| Empirical formula                                 | C <sub>80</sub> H <sub>97</sub> K <sub>2</sub> N <sub>8</sub> O <sub>20</sub> P | C <sub>91</sub> H <sub>126</sub> N <sub>10</sub> O <sub>9</sub> S | C <sub>74</sub> H <sub>74</sub> N <sub>10</sub> O <sub>10</sub> S <sub>2</sub> |
| <i>F</i> <sub>w</sub>                             | 1599.83                                                                         | 1536.07                                                           | 1327.55                                                                        |
| Crystal color                                     | light-yellow                                                                    | yellow                                                            | red                                                                            |
| <i>T</i> /K                                       | 296                                                                             | 100.15                                                            | 149.96                                                                         |
| Crystal system                                    | Triclinic                                                                       | Triclinic                                                         | Monoclinic                                                                     |
| Space group                                       | <i>P</i> -1                                                                     | <i>P</i> -1                                                       | <i>P</i> 2 <sub>1</sub> /n                                                     |
| <i>a</i> /Å                                       | 12.111(2)                                                                       | 18.519(3)                                                         | 9.5514(17)                                                                     |
| <i>b</i> /Å                                       | 17.685(3)                                                                       | 20.485(4)                                                         | 29.487(6)                                                                      |
| <i>c</i> /Å                                       | 25.349(5)                                                                       | 23.872(4)                                                         | 25.410(5)                                                                      |
| <i>α</i> /°                                       | 74.055(4)                                                                       | 75.864(4)                                                         | 90                                                                             |
| <i>β</i> /°                                       | 88.954(5)                                                                       | 78.757(4)                                                         | 95.276(5)                                                                      |
| <i>γ</i> /°                                       | 74.796(4)                                                                       | 83.012(4)                                                         | 90                                                                             |
| <i>V</i> /Å <sup>3</sup>                          | 5029.0(16)                                                                      | 8587(3)                                                           | 7126(2)                                                                        |
| <i>Z</i>                                          | 2                                                                               | 4                                                                 | 4                                                                              |
| <i>D</i> <sub>calc</sub> /g cm <sup>-3</sup>      | 1.057                                                                           | 1.188                                                             | 1.237                                                                          |
| <i>F</i> (000)                                    | 1692.0                                                                          | 3320                                                              | 2800                                                                           |
| <i>μ</i> /mm <sup>-1</sup>                        | 0.171                                                                           | 0.100                                                             | 0.139                                                                          |
| Crystal size (mm <sup>3</sup> )                   | 0.30×0.20×0.20                                                                  | 0.20×0.15×0.10                                                    | 0.05×0.03×0.01                                                                 |
| <i>θ</i> range (°)                                | 1.29–27.47                                                                      | 1.12–25.38                                                        | 2.21–25.41                                                                     |
| Reflections collected                             | 74883                                                                           | 61573                                                             | 79206                                                                          |
| Independent reflections                           | 22165                                                                           | 31146                                                             | 13116                                                                          |
| Observed reflections [ <i>I</i> > 2σ( <i>I</i> )] | 8067                                                                            | 10342                                                             | 7096                                                                           |
| <i>R</i> <sub>int</sub>                           | 0.1305                                                                          | 0.1332                                                            | 0.0886                                                                         |

|                          |        |        |        |
|--------------------------|--------|--------|--------|
| Refined parameters       | 993    | 2043   | 842    |
| Goodness of fit on $F^2$ | 1.043  | 1.005  | 1.116  |
| $R1 [I > 2\sigma(I)]$    | 0.0994 | 0.1172 | 0.1099 |
| $wR2$ (all data)         | 0.2412 | 0.2923 | 0.3059 |

**Table S2.** Hydrogen bonds around the  $\text{HPO}_4^{2-}$  ions in complex **1**.

| $\text{HPO}_4$ | D–H $\cdots$ A     | $d(\text{D–H})$ | $d(\text{H}\cdots\text{A})$ | $d(\text{D}\cdots\text{A})$ | $\angle(\text{DHA})$ |
|----------------|--------------------|-----------------|-----------------------------|-----------------------------|----------------------|
| P1             | N5–H5 $\cdots$ O5  | 0.860           | 1.956                       | 2.767                       | 157                  |
|                | N6–H6A $\cdots$ O5 | 0.860           | 1.980                       | 2.754                       | 149                  |
|                | N3–H3A $\cdots$ O6 | 0.860           | 1.948                       | 2.748                       | 154                  |
|                | N4–H4A $\cdots$ O6 | 0.860           | 1.994                       | 2.794                       | 154                  |
|                | N7–H7A $\cdots$ O8 | 0.860           | 2.150                       | 2.921                       | 149                  |
|                | N8–H8 $\cdots$ O8  | 0.860           | 2.036                       | 2.827                       | 153                  |
|                | N1–H1 $\cdots$ O8  | 0.860           | 2.052                       | 2.882                       | 162                  |
|                | N2–H2 $\cdots$ O8  | 0.860           | 2.234                       | 2.974                       | 144                  |

The structure of the dimer complex **1** possesses a  $P-1$  symmetry. Each  $\text{HPO}_4^{2-}$  moiety receives 8 N–H $\cdots$ O hydrogen bonds from the two bis(urea) subunits, in which  $\text{HPO}_4^{2-}$  ion itself interacts with four urea groups (N $\cdots$ O distances in the range 2.748–2.974 Å, average 2.833 Å; the N–H $\cdots$ O angles from 144° and 162°, average 152°). Four  $[\text{K}([\text{18}]\text{crown-6})]^+$  counter cations situate around complex **1** and form weak C–H $\cdots$  $\pi$  interactions with the dangling phenyl rings of TPE (3.556–3.776 Å, Fig. S6b), contributing to restriction of the intramolecular rotation of TPE and fluorescence enhancement. Two of them coordinate to O atoms of urea groups and the other two interact with the O atoms of  $\text{HPO}_4^{2-}$ . The phenyl $\cdots$ phenyl separation between the two TPE cores within one  $\text{A}_2\text{L}_2$  complex **1** is 4.105 Å (C18 $\cdots$ C41; Fig. S6a).

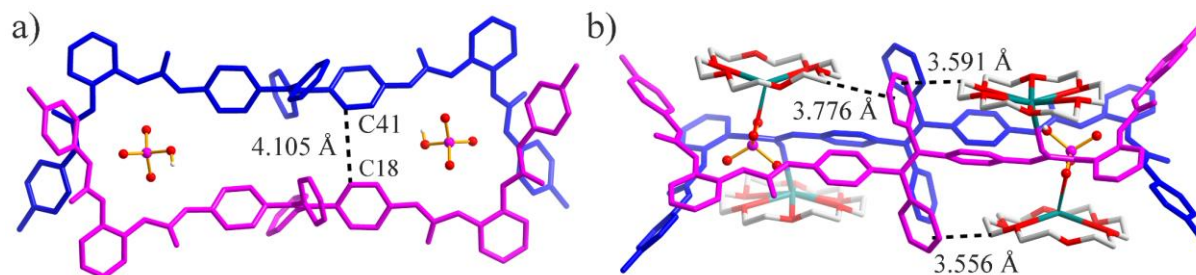

**Fig. S9** a) Intermolecular phenyl $\cdots$ phenyl separations of the non-free TPE cores in the  $\text{A}_2\text{L}_2$  complex **1**; b) C–H $\cdots$  $\pi$  interactions between the free TPE phenyl and  $[\text{K}([\text{18}]\text{crown-6})]^+$  in complex **1**.

**Table S3.** Hydrogen bonds around the SO<sub>4</sub><sup>2-</sup> ions in complex **2**.

| SO <sub>4</sub> | D–H···A        | <i>d</i> (D–H) | <i>d</i> (H···A) | <i>d</i> (D···A) | ∠(DHA) |
|-----------------|----------------|----------------|------------------|------------------|--------|
| S1              | N9–H9···O10    | 0.880          | 2.241            | 3.023            | 148    |
|                 | N10–H10A···O10 | 0.880          | 2.042            | 2.883            | 160    |
|                 | N11–H11D···O9  | 0.880          | 2.101            | 2.920            | 155    |
|                 | N12–H12A···O9  | 0.880          | 2.066            | 2.892            | 156    |
|                 | N13–H13A···O12 | 0.880          | 1.995            | 2.857            | 166    |
|                 | N14–H14A···O11 | 0.880          | 1.926            | 2.782            | 168    |
|                 | N15–H15···O11  | 0.880          | 1.973            | 2.830            | 165    |
|                 | N16–H16A···O10 | 0.880          | 2.094            | 2.850            | 143    |
| S2              | N1–H1···O14    | 0.880          | 2.150            | 2.938            | 149    |
|                 | N2–H2···O13    | 0.880          | 2.022            | 2.853            | 157    |
|                 | N3–H3···O13    | 0.880          | 2.081            | 2.943            | 167    |
|                 | N4–H4A···O15   | 0.880          | 1.962            | 2.773            | 153    |
|                 | N5–H5A···O14   | 0.880          | 2.105            | 2.974            | 174    |
|                 | N6–H6A···O16   | 0.880          | 1.956            | 2.800            | 162    |
|                 | N7–H7A···O16   | 0.880          | 2.053            | 2.825            | 146    |
|                 | N8–H8A···O13   | 0.880          | 2.114            | 2.894            | 148    |

The structure of the dimer complex **2** possesses a *P-I* symmetry and the structure is the analogue of complex **1**. Two SO<sub>4</sub><sup>2-</sup> moiety receives 8 N–H···O hydrogen bonds respectively, and the hydrogen bonds of SO<sub>4</sub><sup>2-</sup> (S1) bonds with four urea groups (N···O distances in the range 2.782–3.023 Å, average 2.879 Å; the N–H···O angles from 143° and 168°, average 158°); SO<sub>4</sub><sup>2-</sup> (S2) bonds with four urea groups (N···O distances in the range 2.773–2.974 Å, average 2.875 Å; the N–H···O angles from 146° and 174°, average 157°). Four TBA<sup>+</sup> counter-cations are located around the [(SO<sub>4</sub>)<sub>2</sub>(L)<sub>2</sub>]<sup>4+</sup> moiety and two of them interact with phenyl rings of TPE cores through cation- $\pi$  interactions (Fig. 1b). The shortest phenyl···phenyl separation between the two TPE cores within one A<sub>2</sub>L<sub>2</sub> complex **2** is 3.562 Å (C19···C38) and 3.585 Å (C64···C69; Fig. S10).

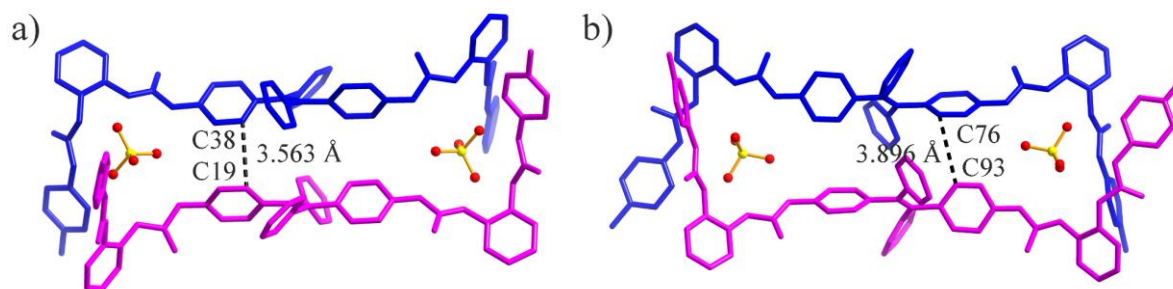

**Fig. S10** Intermolecular phenyl...phenyl separations of the non-free TPE cores in the  $A_2L_2$  complex **2**: a) 3.563 Å (C19...C38) and b) 3.896 Å (C76...C93).

**Table S4.** Hydrogen bonds around the  $SO_4^{2-}$  ions in complex **4**.

| $SO_4$ | D-H...A    | $d(D-H)$ | $d(H...A)$ | $d(D...A)$ | $\angle(DHA)$ |
|--------|------------|----------|------------|------------|---------------|
| S1     | N1-H1...O8 | 0.880    | 2.076      | 2.892      | 155           |
|        | N2-H2...O8 | 0.880    | 2.232      | 3.035      | 152           |
|        | N3-H3...O5 | 0.880    | 1.928      | 2.800      | 173           |
|        | N5-H5...O7 | 0.880    | 2.034      | 2.889      | 164           |
|        | N6-H6...O6 | 0.880    | 1.930      | 2.800      | 170           |
|        | N7-H7...O6 | 0.880    | 2.022      | 2.887      | 169           |
|        | N8-H8...O5 | 0.880    | 2.036      | 2.793      | 145           |

The structure of the complex **4** possesses a  $P2_1/n$  symmetry. Each  $SO_4^{2-}$  moiety receives 7 N-H...O hydrogen bonds from the two bis(urea) subunits, in which  $SO_4^{2-}$  ion itself interacts with four urea groups (N...O distances in the range 2.793–3.035 Å, average 2.871 Å; the N-H...O angles from 145° and 173°, average 161°). The shortest phenyl...phenyl separation between the two TPE cores within one  $A_2L_2$  complex **4** is 3.771 Å (C21...C38, Fig. S11). Compared with the structure of complex **2** (single sulfate complex) that the distance of phenyl...phenyl is relatively long which indicated that the non-covalent interactions between  $A_2L_2$  and  $MV^{2+}$  makes the distance between two ligands bigger.

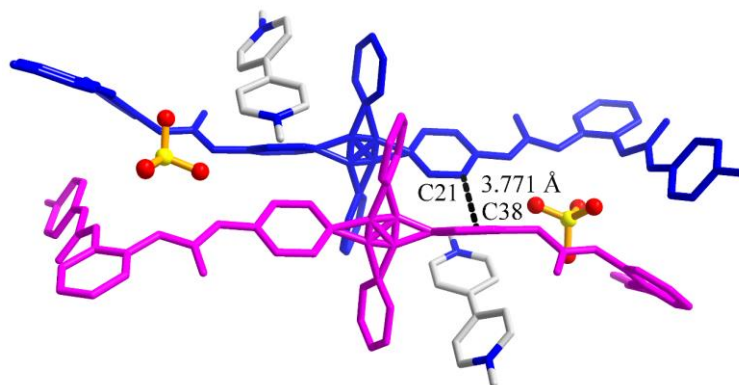

**Fig. S11** Intermolecular phenyl...phenyl separations of the non-free TPE cores in the complex **4**.

#### S4. NMR spectroscopy

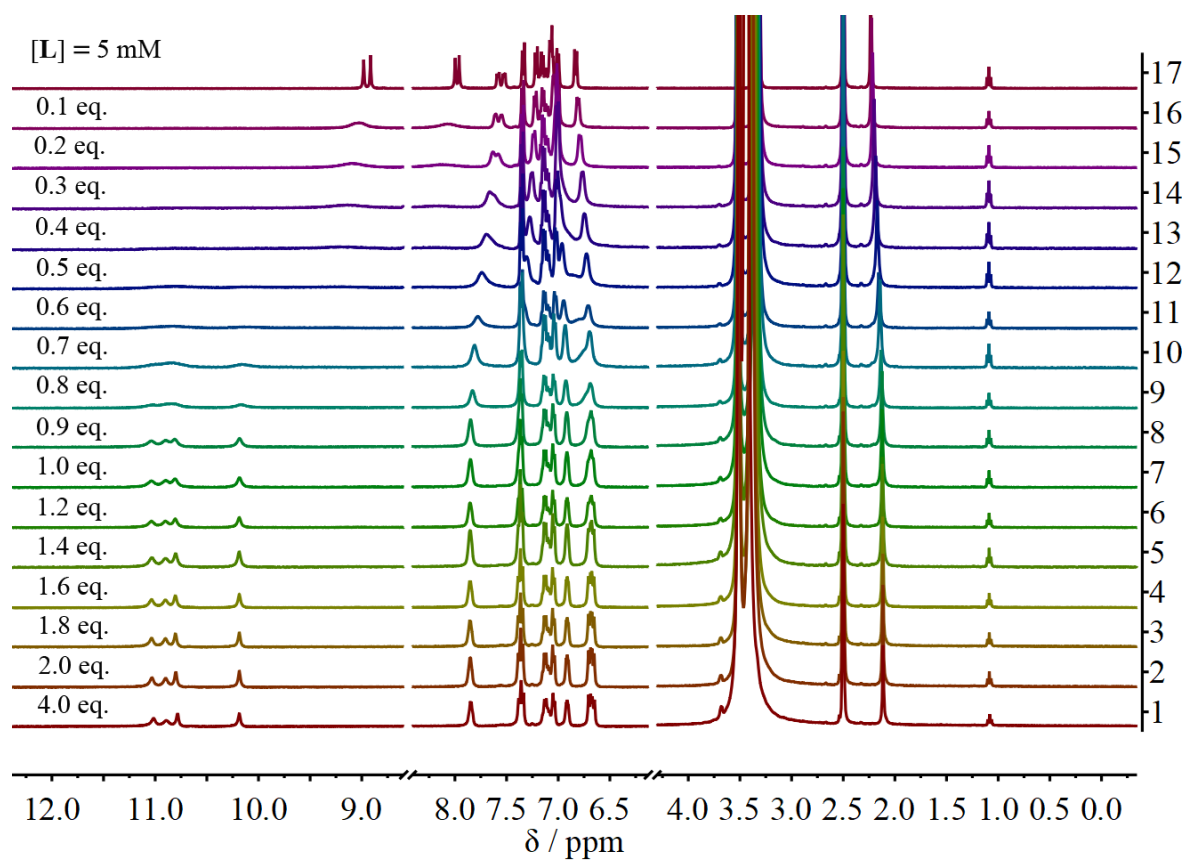

**Fig. S12**  $^1\text{H}$  NMR spectra (400 MHz,  $[\text{D}_6]\text{DMSO}$ ) of **L** (5 mM) in presence of various equivalents of  $\text{HPO}_4^{2-}$  ions (added as  $[\text{K}([\text{18}\text{crown-6})]^+]$  salt).

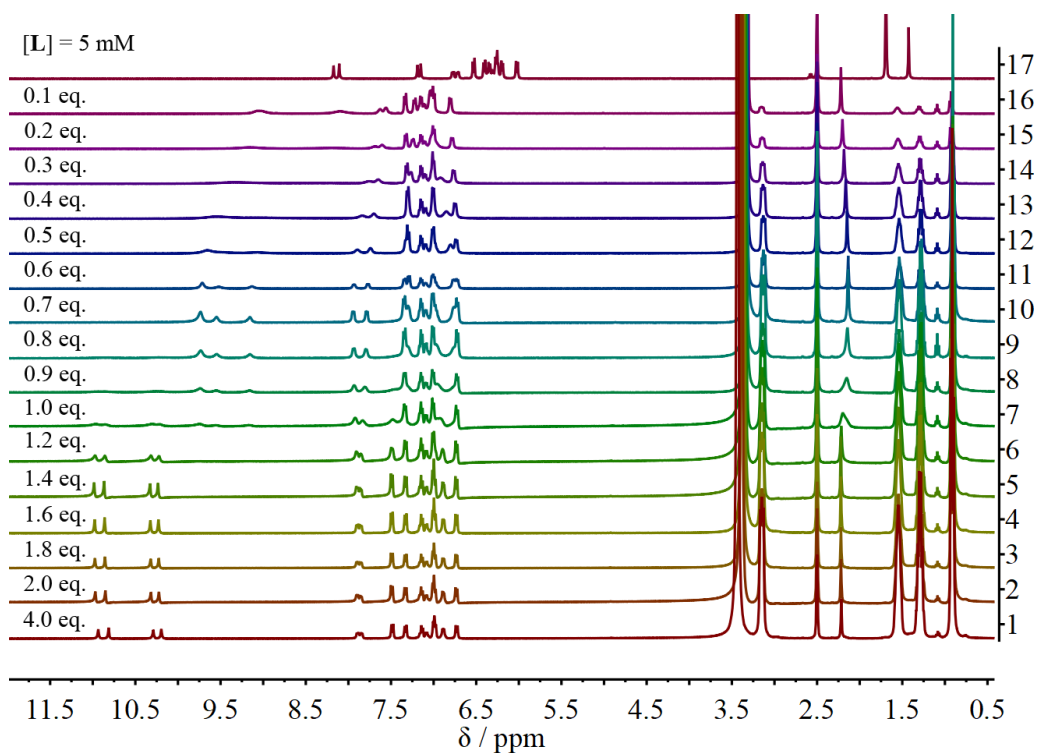

**Fig. S13**  $^1\text{H}$  NMR spectra (400 MHz,  $[\text{D}_6]\text{DMSO}$ ) of **L** (5 mM) in presence of various equivalents of  $\text{SO}_4^{2-}$  ions (added as  $\text{TBA}^+$  salt).

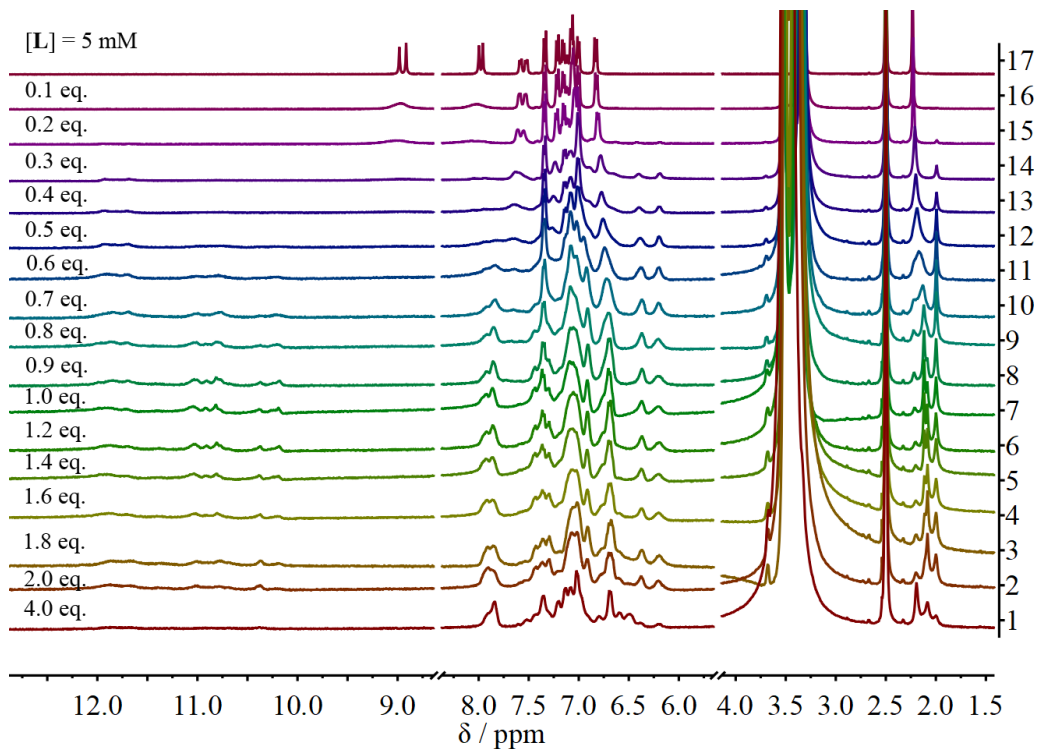

**Fig. S14**  $^1\text{H}$  NMR spectra (400 MHz,  $[\text{D}_6]\text{DMSO}$ ) of **L** (5 mM) in presence of various equivalents of  $\text{PO}_4^{3-}$  ions (added as  $[\text{K}([\text{18}\text{crown-6})]^+]$  salt).

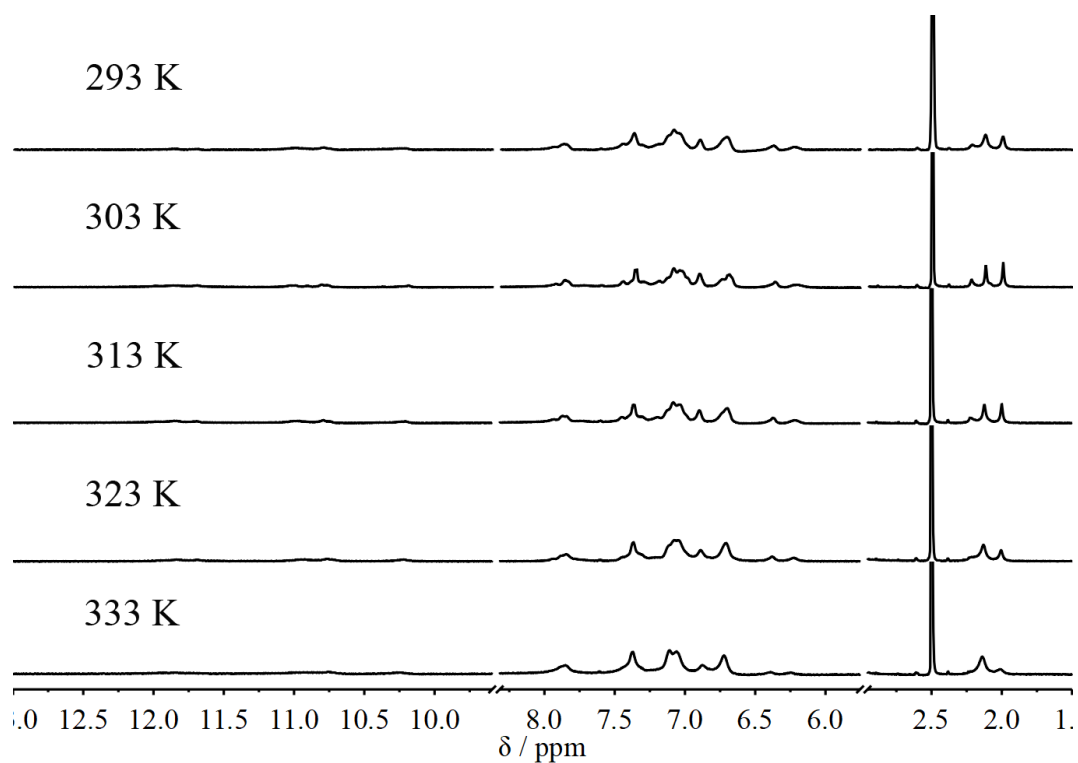

**Fig. S15**  $^1\text{H}$  NMR spectra (400 MHz,  $[\text{D}_6]\text{DMSO}$ ) of **L** with 1.0 equiv of  $[\text{K}([\text{18}]\text{crown-6})]_3\text{PO}_4$  in different temperatures: 293 K, 303 K, 313 K, 323 K, 333 K.

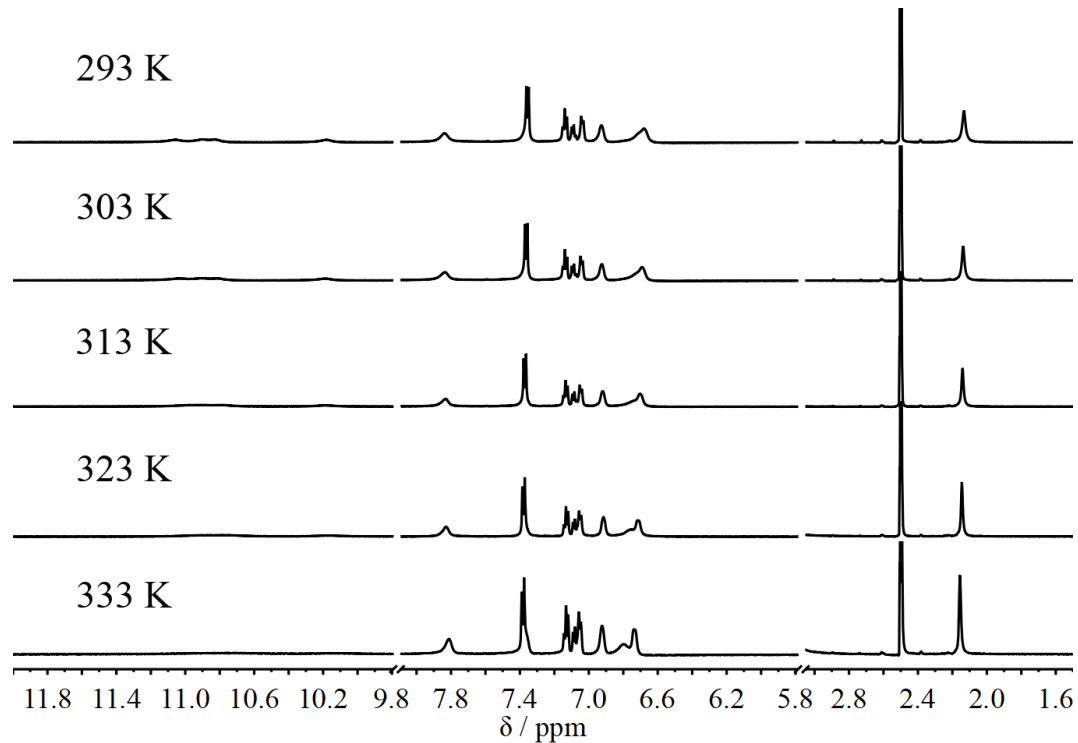

**Fig. S16**  $^1\text{H}$  NMR spectra (400 MHz,  $[\text{D}_6]\text{DMSO}$ ) of **L** with 1.0 equiv of  $[\text{K}([\text{18}]\text{crown-6})]_2\text{HPO}_4$  in different temperatures: 293 K, 303 K, 313 K, 323 K, 333 K.



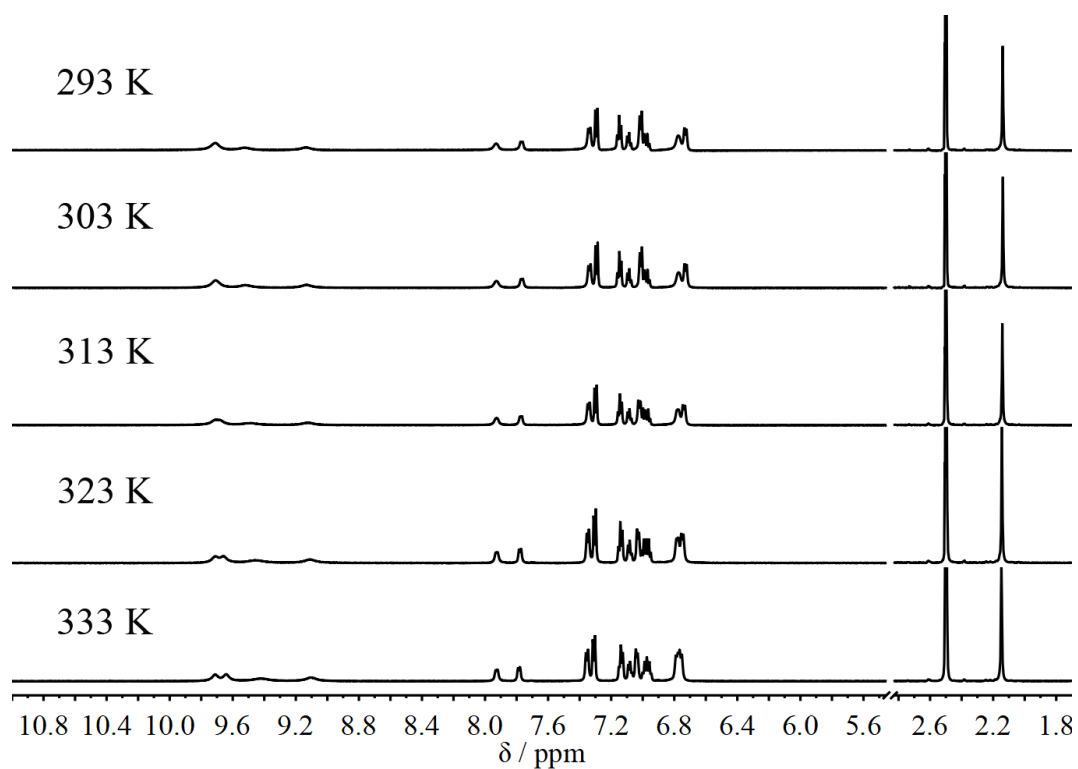

**Fig. S17**  $^1\text{H}$  NMR spectra (400 MHz,  $[\text{D}_6]$ DMSO) of **L** with 1.0 equiv of  $\text{TBA}_2\text{SO}_4$  in different temperatures: 293 K, 303 K, 313 K, 323 K, 333 K.

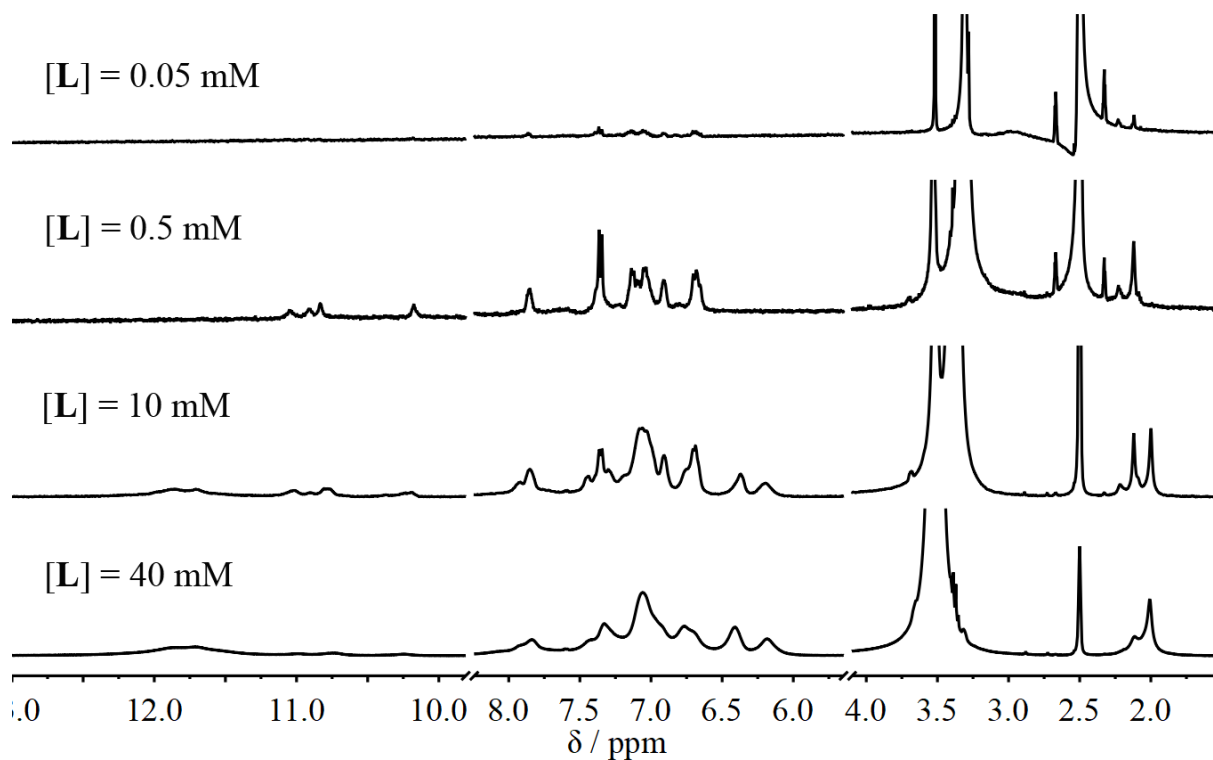

**Fig. S18**  $^1\text{H}$  NMR spectra (400 MHz,  $[\text{D}_6]$ DMSO) of **L** with 1.0 equiv of  $[\text{K}([\text{18}]\text{crown-6})]_3\text{PO}_4$  in different concentrations :  $[\text{L}] = 0.05, 0.5, 10, 40$  mM.

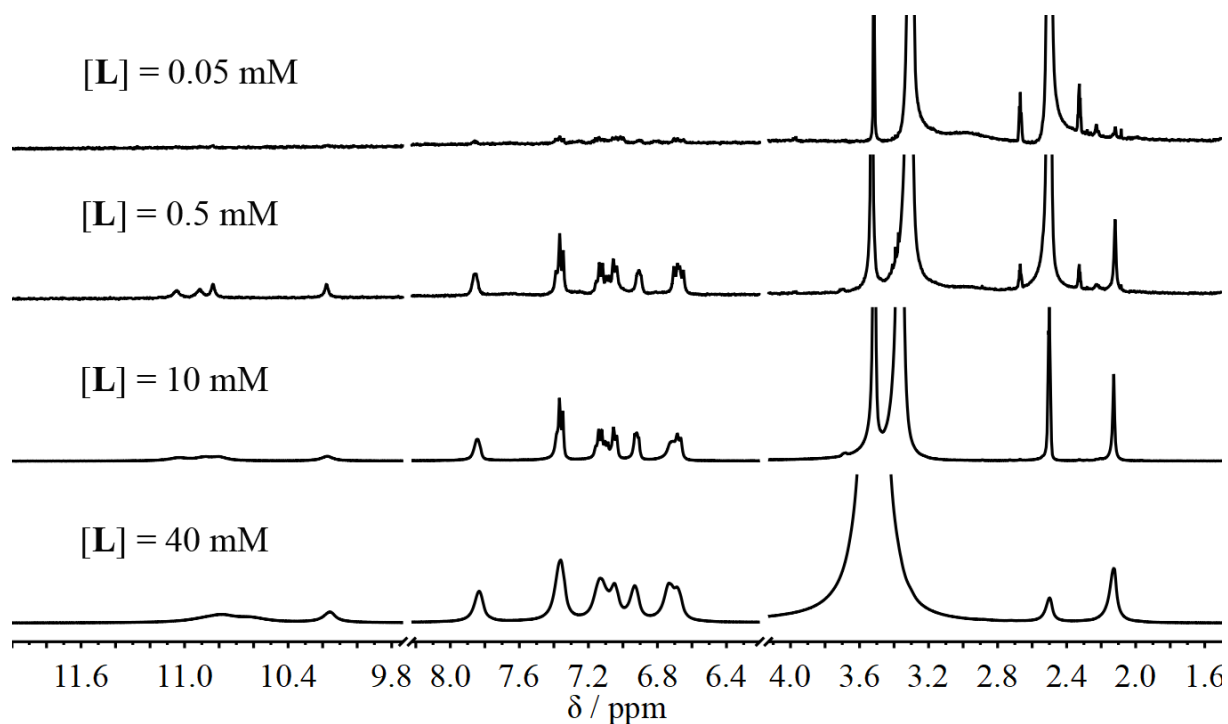

**Fig. S19**  $^1\text{H}$  NMR spectra (400 MHz,  $[\text{D}_6]$ DMSO) of **L** with 1.0 equiv of  $[\text{K}([\text{18}]\text{crown-6})]_2\text{HPO}_4$  in different concentrations :  $[\text{L}] = 0.05, 0.5, 10, 40$  mM.

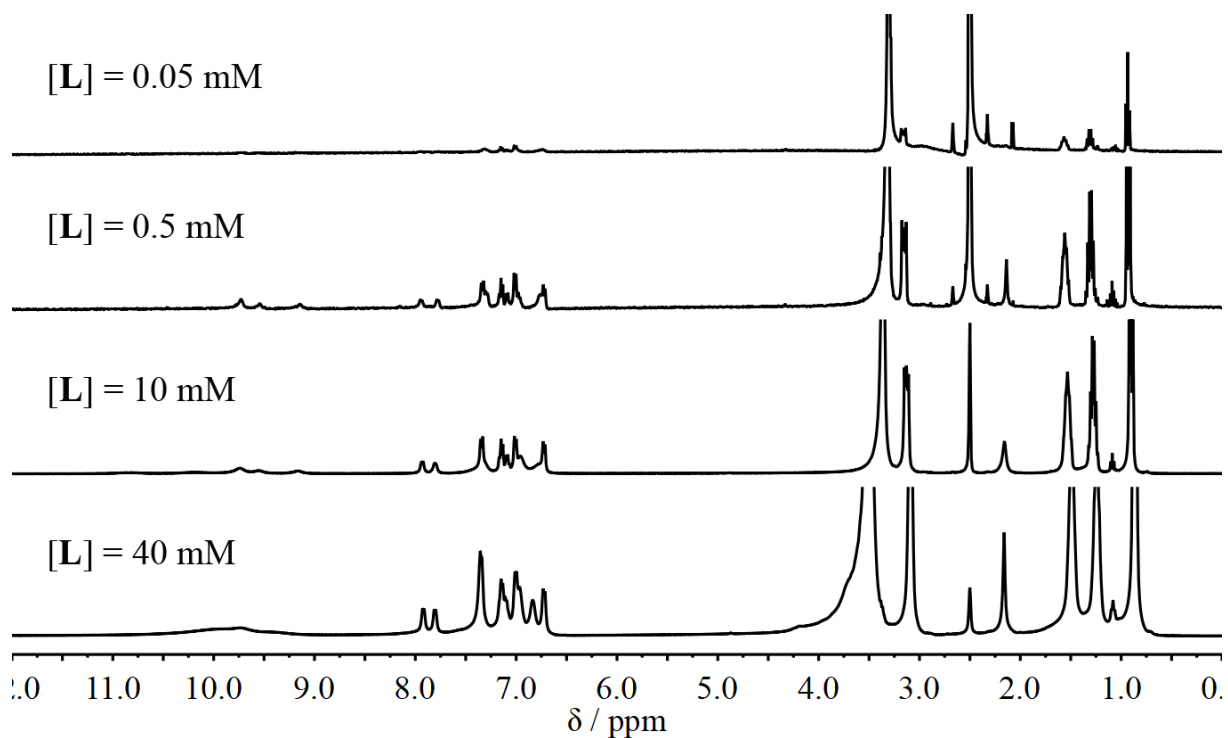

**Fig. S20**  $^1\text{H}$  NMR spectra (400 MHz,  $[\text{D}_6]$ DMSO) of **L** with 1.0 equiv of  $\text{TBA}_2\text{SO}_4$  in different concentrations :  $[\text{L}] = 0.05, 0.5, 10, 40$  mM.

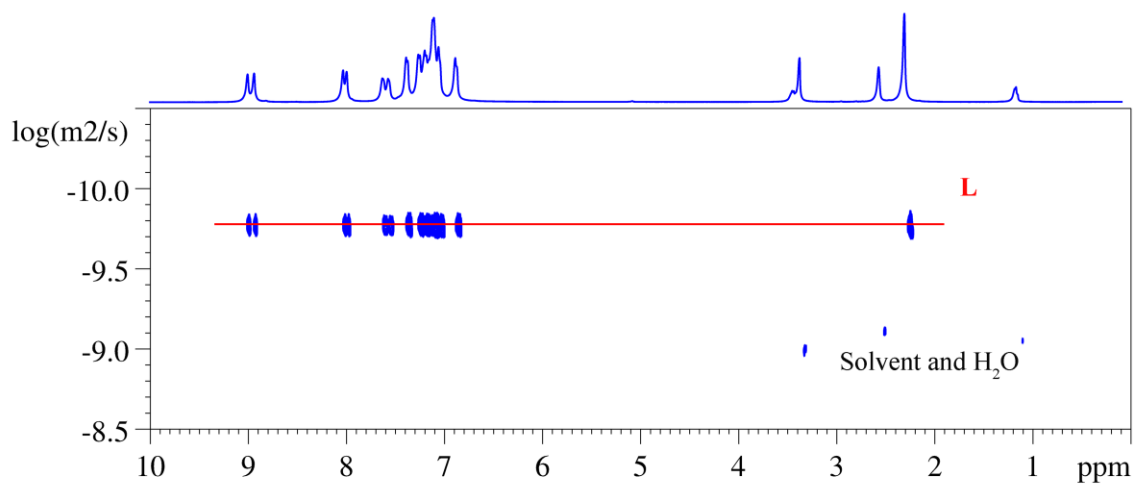

**Fig. S21**  $^1\text{H}$ - $^1\text{H}$  DOSY spectrum of **L** (40mM) (400 MHz,  $[\text{D}_6]$ DMSO, 303 K).

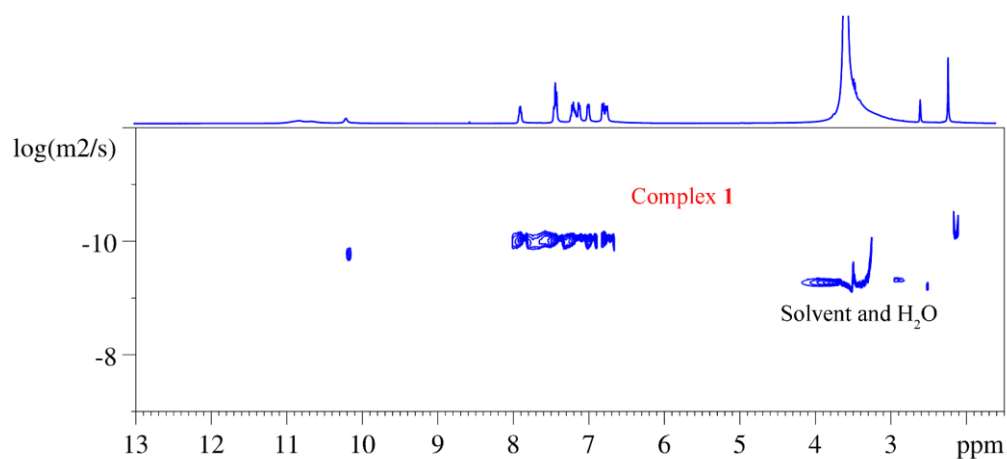

**Fig. S22**  $^1\text{H}$ - $^1\text{H}$  DOSY spectrum of **L** (40mM) with 1.0 equiv of  $[\text{K}([18]\text{crown-6})]_2\text{HPO}_4$  (400 MHz,  $[\text{D}_6]$ DMSO, 303 K).

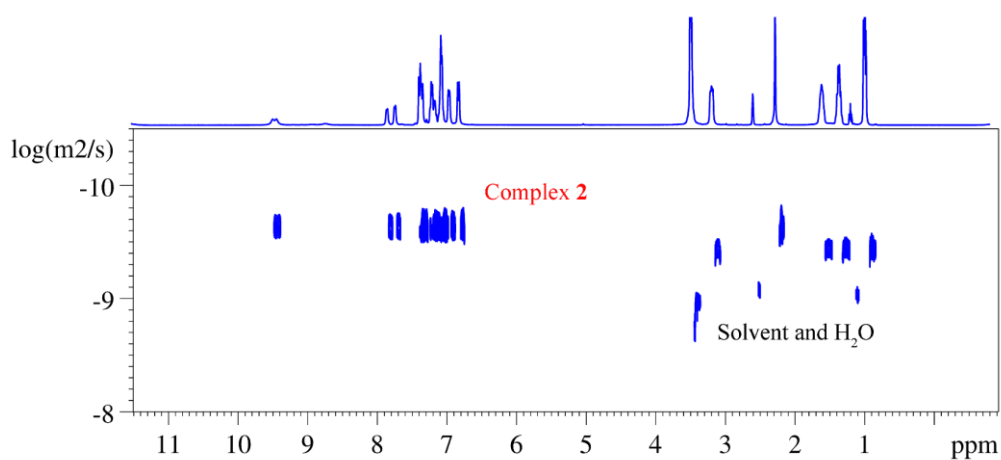

**Fig. S23**  $^1\text{H}$ - $^1\text{H}$  DOSY spectrum of **L** (40mM) with 1.0 equiv of  $\text{TBA}_2\text{SO}_4$  (400 MHz,  $[\text{D}_6]$ DMSO, 303 K).

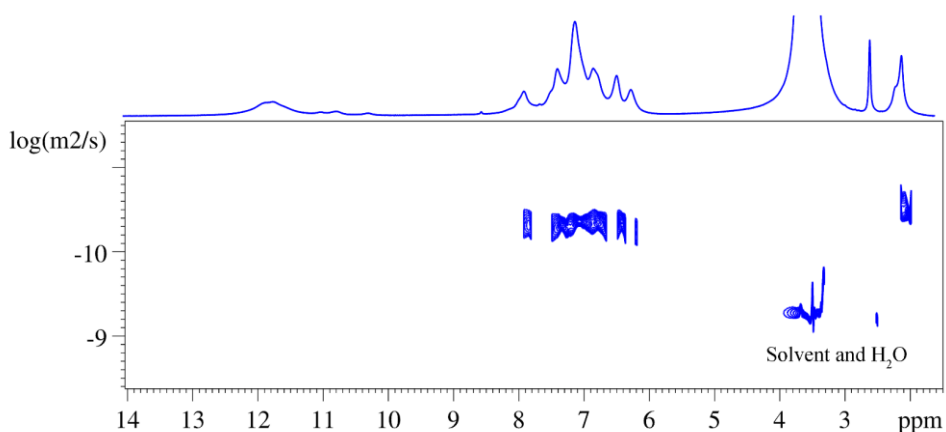

**Fig. S24**  $^1\text{H}$ - $^1\text{H}$  DOSY spectrum of **L** (40mM) with 1.0 equiv of  $[\text{K}([\text{18}]\text{crown-6})]_3\text{PO}_4$  (400 MHz,  $[\text{D}_6]\text{DMSO}$ , 303 K).

Two forms of urea hydrogen were observed when 1.0 equiv phosphate anions (generated in situ from  $\text{K}_3\text{PO}_4$ , and [18]crown-6) was added to the  $[\text{D}_6]\text{DMSO}$  solution of **L** (Figure S1), one owes to  $\text{PO}_4^{3-}$  ions (11.70 ppm to 11.97 ppm) and the other one belongs to  $\text{HPO}_4^{2-}$  ions (10.19 ppm to 11.02 ppm) based on our previous work.<sup>4</sup> However, the  $^1\text{H}$  NMR spectrum of the complex becomes to a single form after  $\text{MVCl}_2$  added to the above solution, which is the same with the  $^1\text{H}$  NMR spectrum of complex **1**. Namely, the complex will become the assemble with  $\text{HPO}_4^{2-}$  ions after adding  $\text{MVCl}_2$ . What is more, four  $^1\text{H}$  NMR signals (9.10 ppm, 8.85 ppm, 8.56 ppm and 7.99 ppm) which should belong to some impurity from  $\text{MVCl}_2$  due to the alkaline environment.

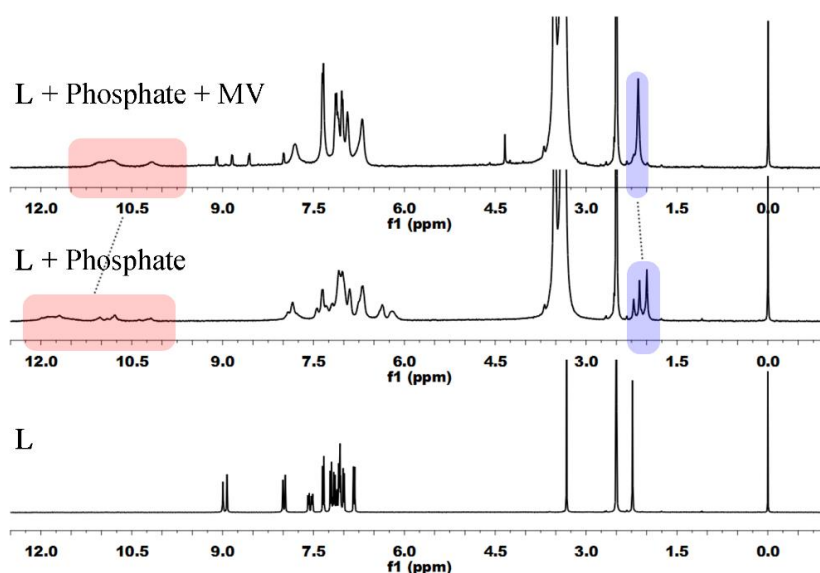

**Fig. S25**  $^1\text{H}$  NMR spectra (400 MHz, 298 K,  $[\text{D}_6]\text{DMSO}$ ) of **L**, **L** with 1.0 equiv phosphate anions and **L** with 1.0 equiv phosphate anions and  $\text{MVCl}_2$ . The read areas are the signals of urea hydrogen and the blue areas are the signals of methyl groups.

## S5. High-resolution MS studies

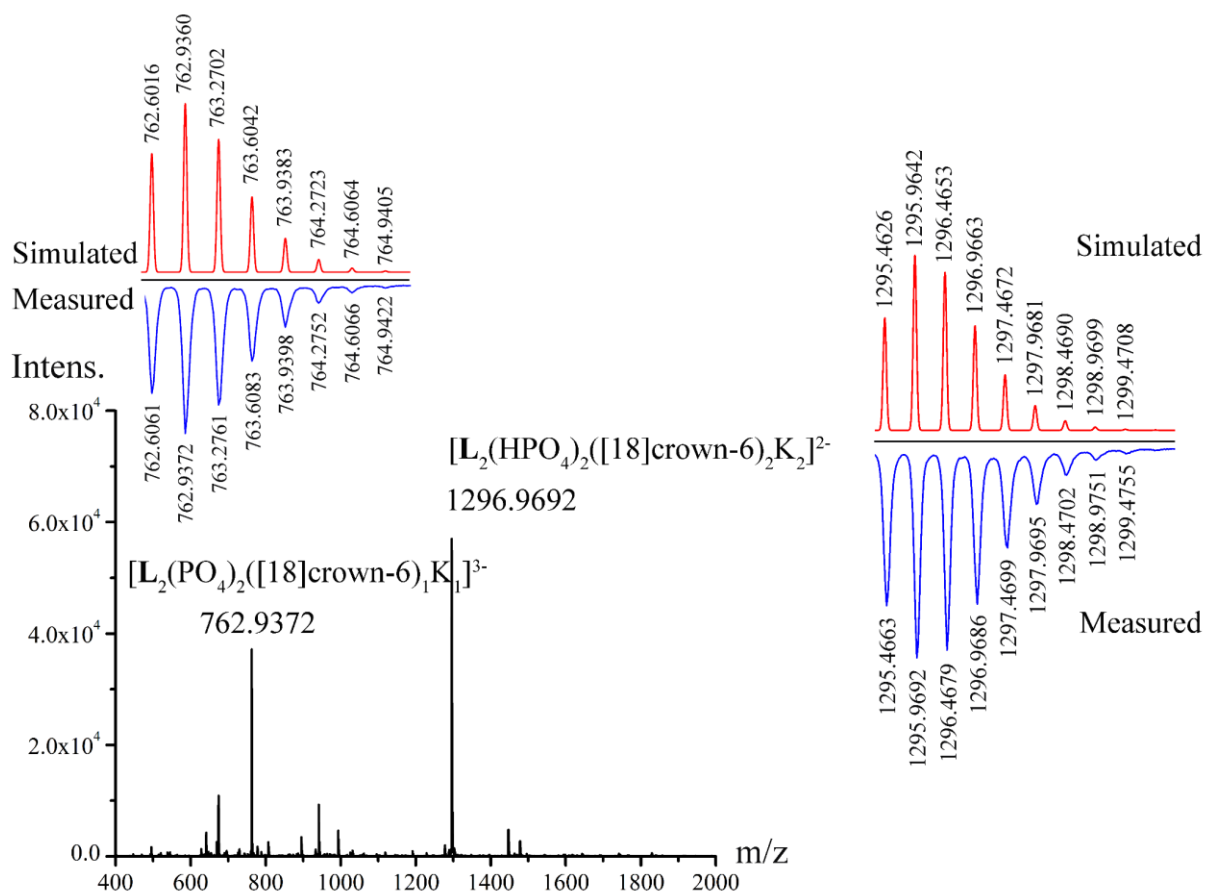

Fig. S26 High-resolution ESI-mass spectra of phosphate complex 1.

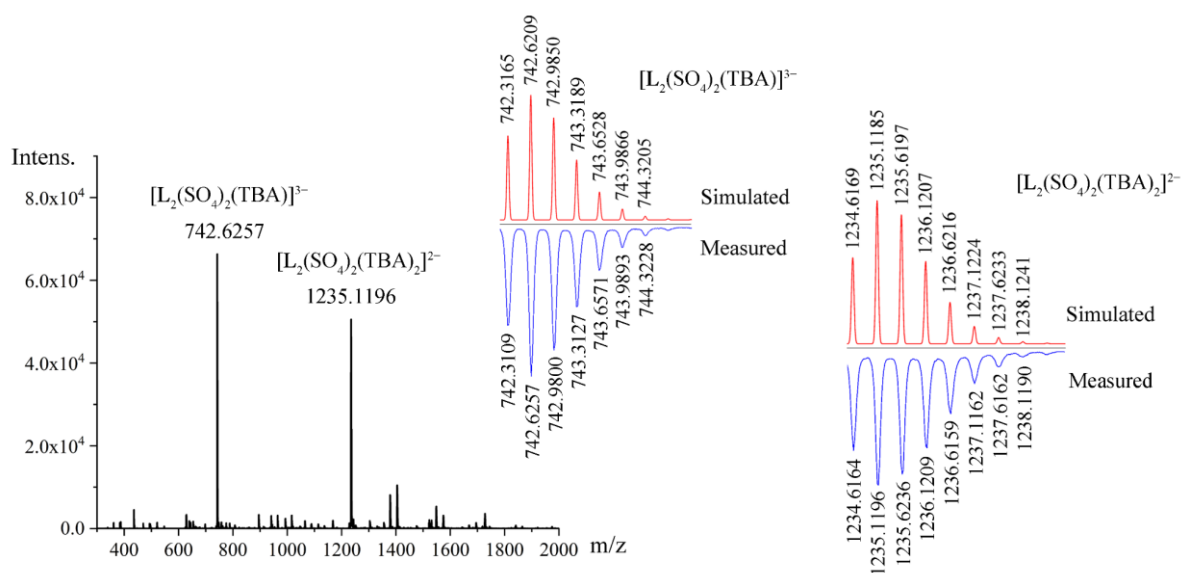

Fig. S27 High-resolution ESI-mass spectra of sulfate complex 2.

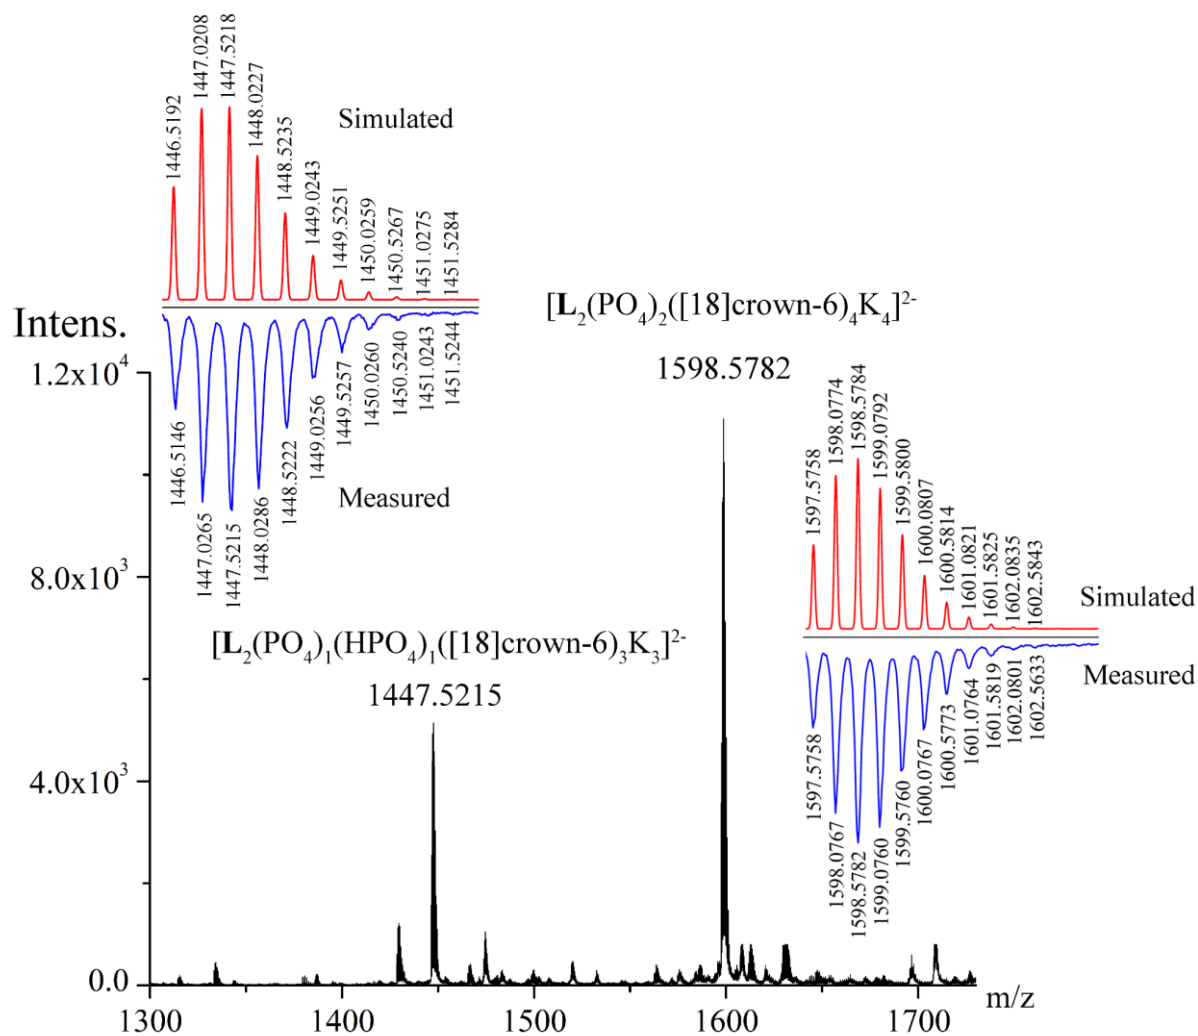

**Fig. S28** High-resolution ESI-mass spectra of **L** with 1.0 equiv phosphate anions.

### S6. Fluorescence and UV-Vis spectra

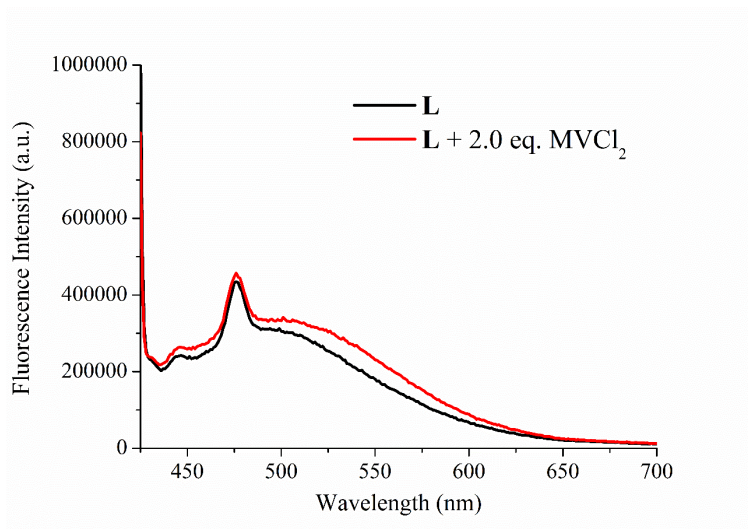

**Fig. S29** Fluorescence spectra of **L** ( $1 \times 10^{-4}$  M in DMSO) and **L** with 2.0 MVCl<sub>2</sub> ( $\lambda_{ex} = 415$  nm).

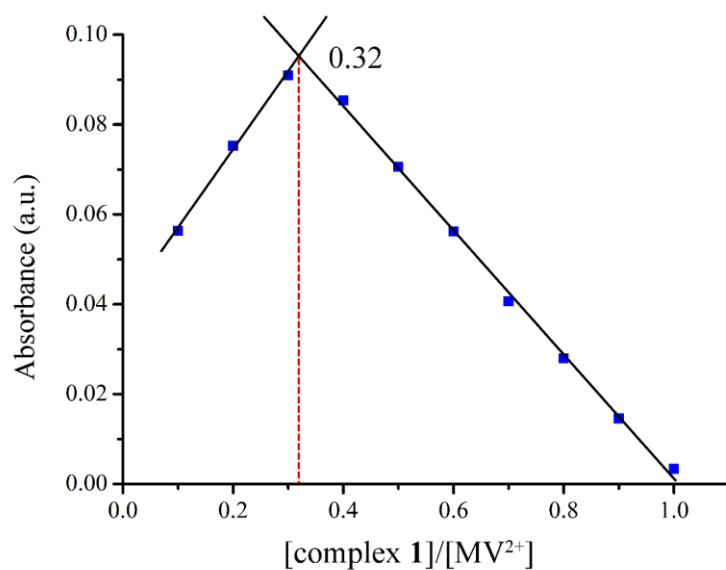

**Fig. S30** Job's plot analyses for the complex **1** with MV<sup>2+</sup> (complex **1** =  $1 \times 10^{-4}$  M in DMSO) and the result shows complex **1** : MV<sup>2+</sup>  $\approx$  1 : 2.

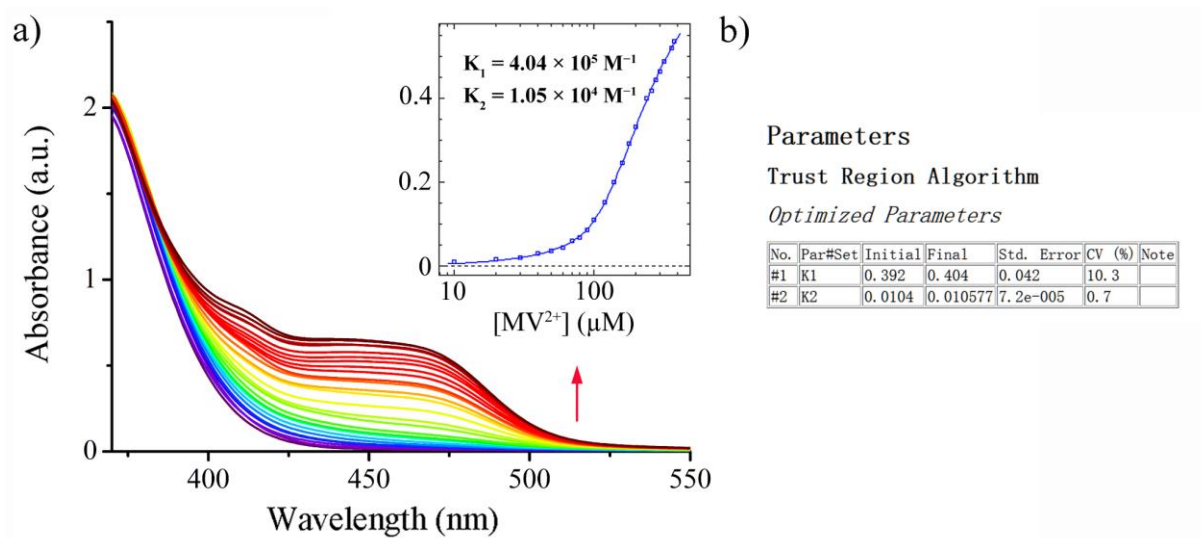

**Fig. S31** a) UV-vis titrations of complex **1** ( $1.0 \times 10^{-4}$  M in DMSO) upon addition of 0-4.0 equiv MVCl<sub>2</sub>. Insets show structures of analytes and the corresponding association constants determined by fitting the titration curves at 475 nm (blue dots) to a 1:2 (host : guest) binding mode by the Dynafit program<sup>5</sup>, which was further confirmed by the Job's plot (Figure S27); b) parameters of the fitting result (error = 10.3% and 0.7%).

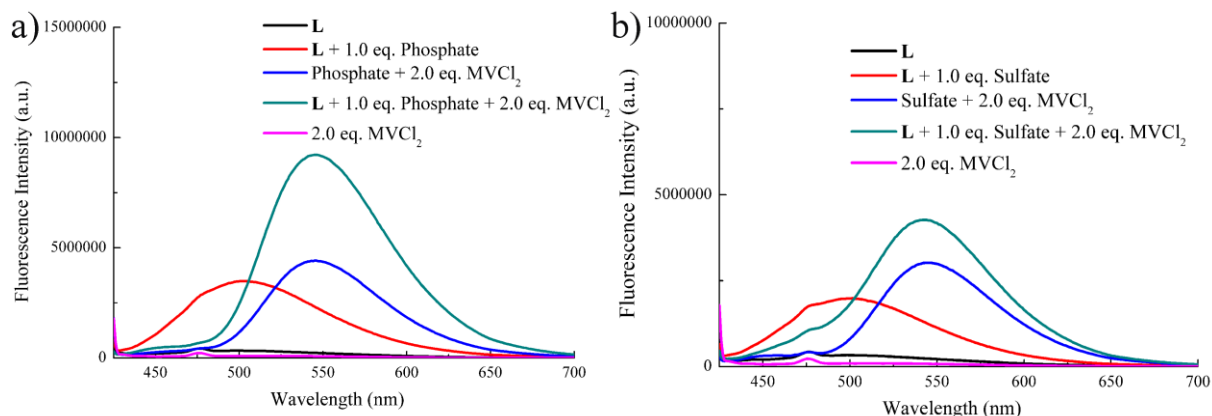

**Fig. S32** a) Fluorescence spectra of **L** ( $1 \times 10^{-4}$  M in DMSO), **L** with 1.0 equiv phosphate anions, **L** with 1.0 equiv phosphate anions and 2.0 equiv MVCl<sub>2</sub>, phosphate anions with 2.0 equiv MVCl<sub>2</sub>; b) Fluorescence spectra of **L** ( $1 \times 10^{-4}$  M in DMSO), **L** with 1.0 equiv phosphate anions, **L** with 1.0 equiv sulfate anions and 2.0 equiv MVCl<sub>2</sub>, sulfate anions with 2.0 equiv MVCl<sub>2</sub> ( $\lambda_{\text{ex}} = 415$  nm).

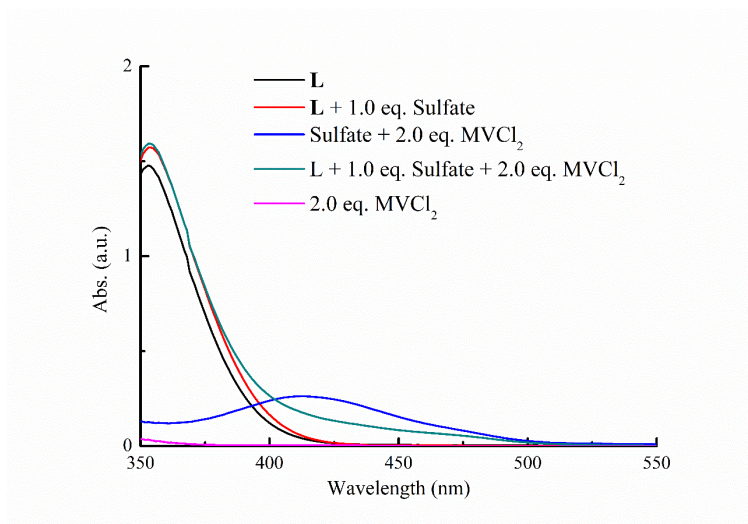

**Fig. S33** Absorption spectra of the **L** upon addition of 1.0 equiv. sulfate anions and both 1.0 equiv. sulfate anions and 2.0 equiv. MVCl<sub>2</sub>, only sulfate anions and 2.0 equiv. MVCl<sub>2</sub> ( $1 \times 10^{-4}$  M in DMSO).

## S7. Density Functional Theory (DFT) computations

The geometries were optimized by the dispersion-corrected semi-empirical PM6 method<sup>6</sup> with implementation of the Gaussian 09 package<sup>7</sup>.



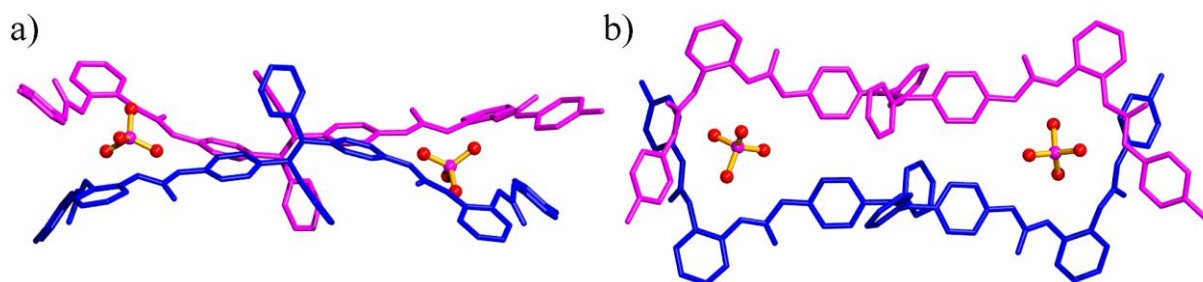

**Fig. S34** The structure of  $[(\text{PO}_4)_2(\text{L})_2]^{6-}$  by PM6 optimization. a) front view; b) top view (non-acidic hydrogen atoms and cations were omitted for clarity).

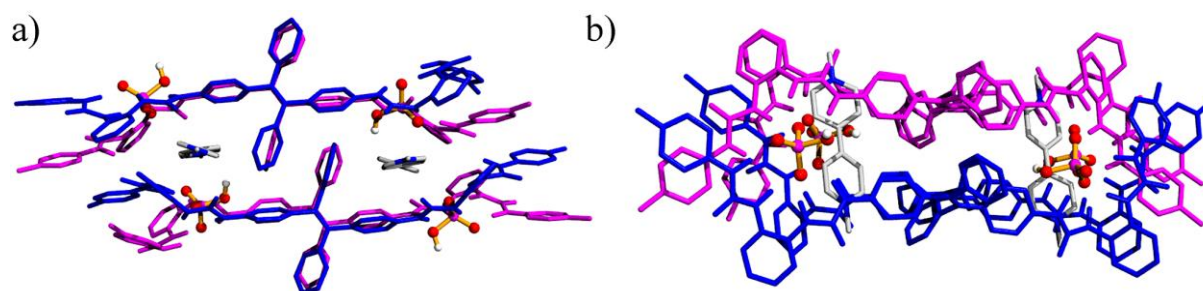

**Fig. S35** The structure of  $[\text{MV}]_2[(\text{HPO}_4)_4(\text{L})_4]^{4-}$  by PM6 optimization. a) front view; b) top view (part non-acidic hydrogen atoms were omitted for clarity).

*Cartesian coordinates* ( $\text{\AA}$ ) for the optimized geometries of  $[(\text{PO}_4)_2(\text{L})_2]^{6-}$

|   |             |             |             |   |             |             |             |
|---|-------------|-------------|-------------|---|-------------|-------------|-------------|
| C | 14.75274400 | -0.36450300 | 4.14627700  | C | 5.94841200  | -5.40576300 | 0.75539300  |
| H | 14.10615900 | -0.34835200 | 5.03314200  | H | 5.03889400  | -5.79939100 | 1.25641100  |
| H | 15.19880000 | 0.63496900  | 4.04581000  | H | 6.05959900  | -5.88402300 | -0.23732900 |
| H | 15.56956100 | -1.06639400 | 4.34786500  | C | 8.26388800  | -6.14056000 | 1.00940700  |
| C | 13.97770900 | -0.72556900 | 2.91762600  | H | 8.09337800  | -6.61231500 | 0.02184700  |
| C | 14.32423100 | -1.84499500 | 2.14969300  | H | 8.69746200  | -6.88763600 | 1.70687100  |
| H | 15.16951700 | -2.46376200 | 2.43977900  | C | 9.16496300  | -4.92137700 | 0.86616600  |
| C | 13.60145800 | -2.17893000 | 1.00333500  | H | 10.02372500 | -5.13370800 | 0.19269600  |
| H | 13.87524300 | -3.05404800 | 0.40856400  | H | 8.63674500  | -4.01159200 | 0.48737800  |
| C | 12.50273200 | -1.38930100 | 0.61911200  | O | 9.11837400  | 0.20719600  | 0.91629400  |
| C | 12.13936100 | -0.27142900 | 1.40107200  | O | 7.00303900  | -0.02443300 | -0.56425000 |
| H | 11.25428300 | 0.31907500  | 1.12862500  | O | 9.67868900  | -4.66374200 | 2.20146600  |
| C | 12.88209600 | 0.06433300  | 2.52515000  | O | 10.27574700 | -2.85906300 | 4.53743800  |
| H | 12.60730400 | 0.94925200  | 3.09816800  | O | 8.12463500  | -0.85078600 | 4.07527300  |
| C | 11.53036700 | -2.96949300 | -1.03257900 | O | 5.26838300  | -1.47786000 | 4.13079200  |
| C | 10.05093500 | -4.32053800 | -2.46693500 | O | 5.25039400  | -3.41442000 | 1.82735700  |
| C | 8.64576800  | -4.52728100 | -2.62113400 | O | 6.99801700  | -5.84815300 | 1.64073800  |
| C | 8.18594400  | -5.75519900 | -3.12459500 | C | 1.89401100  | -1.56260500 | 5.75356300  |
| H | 7.11555900  | -5.89000700 | -3.30295000 | N | 6.15168700  | 2.18470500  | 1.07744800  |

|   |             |             |             |   |              |             |             |
|---|-------------|-------------|-------------|---|--------------|-------------|-------------|
| C | 9.08306900  | -6.78460900 | -3.41143500 | H | 6.56874200   | 1.35152900  | 0.54999400  |
| H | 8.70945300  | -7.72886000 | -3.79764200 | N | 8.34703300   | 2.81177700  | 1.57294900  |
| C | 10.45154900 | -6.60415400 | -3.20044900 | H | 8.70700100   | 1.13730100  | 1.14880700  |
| H | 11.14848100 | -7.41168200 | -3.40463500 | H | 7.99080500   | 2.41771600  | -1.39516700 |
| C | 10.93336000 | -5.37937600 | -2.73582600 | H | 10.38225100  | 1.67579100  | 0.55244700  |
| H | 12.00337700 | -5.23307800 | -2.56558200 | N | 10.96323000  | 1.83825000  | -1.87595600 |
| C | 6.52979100  | -3.27211300 | -2.85641600 | H | 10.42084800  | 0.95763300  | -1.55327100 |
| C | 4.45095300  | -1.90204200 | -2.62830000 | C | -10.28994700 | 3.40180200  | -2.31704600 |
| C | 3.84074100  | -0.88031700 | -1.86764300 | H | -9.82875000  | 2.43442700  | -2.01593000 |
| H | 4.45715300  | -0.26945200 | -1.18937000 | H | -11.09153900 | 3.65719400  | -1.58417000 |
| C | 2.47508200  | -0.65644300 | -1.96836500 | C | -10.84729000 | 3.40904100  | -3.73636500 |
| H | 2.01111100  | 0.12451300  | -1.36462000 | H | -10.94037900 | 4.44298800  | -4.12997700 |
| C | 1.69056500  | -1.44701800 | -2.82288600 | H | -11.83950100 | 2.91429400  | -3.76217700 |
| C | 2.30991400  | -2.40100900 | -3.64358400 | C | -10.11832000 | 1.36878400  | -4.85842200 |
| H | 1.70891200  | -2.98217500 | -4.34054200 | H | -11.18054400 | 1.08336800  | -4.72623400 |
| C | 3.68101100  | -2.63169700 | -3.55520500 | H | -9.82174100  | 1.21477900  | -5.91744500 |
| H | 4.15873100  | -3.38788700 | -4.18703400 | C | -9.22293400  | 0.57752900  | -3.91001900 |
| C | 0.21096900  | -1.36796300 | -2.75501900 | H | -9.56398500  | -0.47225800 | -3.80553600 |
| C | -0.43224200 | -2.00763800 | -1.75483200 | H | -9.15402200  | 1.02283700  | -2.88512600 |
| C | 0.34928400  | -2.70023000 | -0.69545100 | C | -6.95912700  | -0.26441500 | -3.86689700 |
| C | 0.92501000  | -3.95525600 | -0.94439400 | H | -6.91763300  | -0.00844900 | -2.77780900 |
| H | 0.75892100  | -4.44340400 | -1.90242200 | H | -7.29616100  | -1.31561500 | -3.96207700 |
| C | 1.74642000  | -4.54783800 | 0.01794500  | C | -5.63175100  | -0.02880800 | -4.57909400 |
| H | 2.22145600  | -5.50417200 | -0.19008600 | H | -5.76297500  | 0.05423300  | -5.67720200 |
| C | 1.98436400  | -3.90116600 | 1.23470300  | H | -4.91931900  | -0.84674200 | -4.35019200 |
| H | 2.66375900  | -4.34228000 | 1.96405300  | C | -4.24542600  | 1.25702700  | -3.04155900 |
| C | 1.38075200  | -2.66752200 | 1.49672700  | H | -3.50172900  | 2.05264400  | -3.26086300 |
| H | 1.55536500  | -2.16268400 | 2.44804900  | C | -5.07731000  | 1.57776700  | -1.80242300 |
| C | 0.56245900  | -2.06585400 | 0.53806700  | H | -4.56445000  | 1.26051400  | -0.86767400 |
| H | 0.10599900  | -1.09767600 | 0.74385600  | H | -6.08839400  | 1.10466100  | -1.82002900 |
| C | -0.46832100 | -0.54872200 | -3.78079000 | C | -5.75784300  | 3.53696800  | -0.56332100 |
| C | -0.10395500 | 0.79914300  | -3.93290400 | H | -6.81084800  | 3.17150000  | -0.43102900 |
| H | 0.71733000  | 1.21207800  | -3.33314900 | H | -5.14537800  | 3.16436100  | 0.28240800  |
| C | -0.77973400 | 1.61441900  | -4.84236900 | C | -5.66865100  | 5.05408000  | -0.68843200 |
| H | -0.50503400 | 2.66262500  | -4.93782600 | H | -4.70909500  | 5.37062500  | -1.14664200 |
| C | -1.81174200 | 1.08666000  | -5.62456800 | H | -5.77952400  | 5.52974200  | 0.30492200  |
| H | -2.35721600 | 1.72537600  | -6.31530100 | C | -7.91860200  | 5.93467700  | -1.04849200 |
| C | -2.15131200 | -0.26457500 | -5.50576000 | H | -7.77974800  | 6.41590100  | -0.06082700 |
| H | -2.94715200 | -0.67866800 | -6.12154400 | H | -8.29365900  | 6.68344500  | -1.77623000 |
| C | -1.48479300 | -1.08132800 | -4.58920500 | C | -8.86088000  | 4.74520100  | -0.92849500 |
| H | -1.76029600 | -2.13022200 | -4.49441600 | H | -9.75536200  | 4.99467400  | -0.31838000 |
| C | -1.89748900 | -2.05732400 | -1.58883500 | H | -8.37930700  | 3.83532800  | -0.48409500 |
| C | -2.66005600 | -3.04727800 | -2.22876400 | K | -7.15690100  | 3.37710800  | -3.83638600 |
| H | -2.16164300 | -3.77989400 | -2.86308400 | O | -8.32891300  | 2.13485300  | 0.43827800  |

|   |              |             |             |   |              |             |             |
|---|--------------|-------------|-------------|---|--------------|-------------|-------------|
| C | -4.04265600  | -3.09618500 | -2.07909000 | O | -6.68226700  | 0.20666300  | 0.80351100  |
| H | -4.62926600  | -3.84370100 | -2.62905300 | O | -9.29149700  | 4.45446400  | -2.28627100 |
| C | -4.69077700  | -2.15764300 | -1.24014600 | O | -9.96859100  | 2.79612200  | -4.70482400 |
| C | -3.91612900  | -1.15879200 | -0.59635200 | O | -7.91682300  | 0.58697600  | -4.54832200 |
| H | -4.41664600  | -0.41099200 | 0.04801200  | O | -5.03657100  | 1.24334000  | -4.25000200 |
| C | -2.54359100  | -1.11306300 | -0.77610800 | N | -7.54156800  | 3.44917600  | 2.55896300  |
| H | -1.96325600  | -0.33200600 | -0.27995600 | H | -7.82017700  | 2.82372800  | 1.67266700  |
| C | -7.04160800  | -3.04282300 | -1.56685700 | N | -5.65088800  | 2.07189100  | 2.71825300  |
| C | -9.40658900  | -3.39096500 | -1.82835900 | H | -10.67939300 | 0.86566800  | 0.81616000  |
| C | -9.39547200  | -4.21363900 | -2.96637800 | O | -6.63283100  | 5.59920800  | -1.61297700 |
| H | -8.47824800  | -4.28125800 | -3.55259600 | N | -10.34610400 | 3.03263600  | 2.13018200  |
| C | -10.52203600 | -4.95563800 | -3.33631500 | C | -14.26210400 | 0.27577700  | -4.25123800 |
| H | -10.48204200 | -5.58308600 | -4.22114000 | H | -13.83721000 | -0.60684800 | -4.74571100 |
| C | -11.68178800 | -4.88801500 | -2.57129000 | H | -15.31283200 | 0.04379100  | -4.03042800 |
| H | -12.56084700 | -5.46007500 | -2.84918200 | H | -14.24566100 | 1.09901900  | -4.97577600 |
| C | -11.72580100 | -4.07768100 | -1.42903200 | C | -13.52101100 | 0.63479600  | -3.00119600 |
| H | -12.64193500 | -4.03915600 | -0.83059900 | C | -13.90341600 | 1.75691200  | -2.25083200 |
| C | -10.61050100 | -3.33026800 | -1.03974700 | H | -14.74791400 | 2.36167800  | -2.57151400 |
| C | -11.62736100 | -2.51675100 | 1.10432800  | H | -13.52199000 | 2.98093600  | -0.50482200 |
| C | -12.38818000 | -1.13104000 | 3.05983800  | C | -12.12148500 | 1.33366100  | -0.66596900 |
| C | -13.54344500 | -1.88063800 | 3.34834800  | C | -11.72709900 | 0.21016600  | -1.42444100 |
| H | -13.73481800 | -2.81323400 | 2.80873100  | C | -12.43586900 | -0.14370600 | -2.56688000 |
| C | -14.44102500 | -1.41935000 | 4.30901900  | H | -12.14128600 | -1.03737700 | -3.11698800 |
| H | -15.33325100 | -2.00223200 | 4.52409600  | C | -8.45630500  | 4.48458200  | 2.88589600  |
| C | -14.20874600 | -0.21675600 | 4.99377000  | C | -8.04284400  | 5.69215400  | 3.46831100  |
| C | -13.05690100 | 0.52930700  | 4.69719300  | H | -6.99954000  | 5.80317100  | 3.77901200  |
| H | -12.86798000 | 1.47106100  | 5.20938300  | C | -8.95177400  | 6.73519800  | 3.65753600  |
| C | -12.14986400 | 0.08465900  | 3.74002400  | H | -8.61183300  | 7.66470500  | 4.10623900  |
| H | -11.26822800 | 0.68246900  | 3.50820600  | C | -10.28328200 | 6.58967100  | 3.26743100  |
| C | -15.18731800 | 0.26519000  | 6.01974200  | H | -10.98438100 | 7.40914900  | 3.39192600  |
| H | -16.15765000 | 0.49108900  | 5.55801500  | C | -10.72700400 | 5.38062500  | 2.72412100  |
| H | -14.84618300 | 1.17914000  | 6.52082900  | H | -11.77024600 | 5.26035100  | 2.41907900  |
| H | -15.35291000 | -0.49077900 | 6.79729200  | C | -6.31174400  | 3.23640800  | 3.19623400  |
| C | -1.95624600  | -3.64601600 | 1.84181800  | C | -4.28590200  | 1.78120600  | 2.95916300  |
| H | -2.11092700  | -2.99550800 | 0.95508300  | H | -4.37653400  | 0.17261900  | 1.49262800  |
| H | -0.86962200  | -3.73484700 | 2.04452100  | C | -2.37360200  | 0.45821000  | 2.26701100  |
| C | -2.69960400  | -3.12928900 | 3.06861700  | H | -1.94402600  | -0.32518700 | 1.64137800  |
| H | -2.89532000  | -3.92517000 | 3.81093300  | C | -1.54723700  | 1.20641100  | 3.12149700  |
| H | -2.11966700  | -2.30478500 | 3.55223700  | C | -2.11774600  | 2.17279800  | 3.96230200  |
| C | -4.79253600  | -2.05094500 | 3.61881400  | H | -1.48584800  | 2.72035900  | 4.65895600  |
| H | -4.30691800  | -1.13651000 | 4.01669300  | C | -3.47916200  | 2.46377800  | 3.88956900  |
| H | -4.91742000  | -2.79401400 | 4.42762200  | H | -3.91962900  | 3.23569100  | 4.52812100  |
| C | -6.11177800  | -1.71848200 | 2.93396100  | C | -0.07007400  | 1.08744000  | 3.01785200  |
| H | -6.68838600  | -0.96665500 | 3.50852600  | C | 0.55187700   | 1.74889600  | 2.01669800  |

|   |              |             |             |   |             |             |             |
|---|--------------|-------------|-------------|---|-------------|-------------|-------------|
| H | -5.98207100  | -1.32298000 | 1.89567600  | C | -0.26885700 | 2.43208400  | 0.97854600  |
| C | -8.13643400  | -2.85166400 | 2.25180900  | C | -0.87225500 | 3.67184700  | 1.23576900  |
| H | -8.76787200  | -2.14220200 | 2.82526300  | H | -0.67989200 | 4.18043500  | 2.17793200  |
| H | -8.01118100  | -2.45370400 | 1.22092300  | C | -1.76209100 | 4.21783700  | 0.30671000  |
| C | -8.72122400  | -4.26128700 | 2.26142700  | H | -2.25994100 | 5.16050200  | 0.52411500  |
| H | -8.46493300  | -4.82303000 | 3.17881900  | H | -2.78457100 | 3.93157700  | -1.57974500 |
| H | -9.82290600  | -4.23237900 | 2.13935500  | C | -1.40191800 | 2.32753900  | -1.16040600 |
| C | -8.81673300  | -6.11541700 | 0.69254500  | H | -1.61510800 | 1.79768000  | -2.08966500 |
| H | -8.65873800  | -6.91646000 | 1.43716400  | C | -0.50647400 | 1.77774200  | -0.24055600 |
| H | -9.89915800  | -5.88736000 | 0.59983100  | H | -0.01250900 | 0.83164200  | -0.45983200 |
| C | -8.22534300  | -6.46436100 | -0.66996900 | C | 0.60368000  | 0.21110200  | 3.99660600  |
| H | -8.92504100  | -7.08128800 | -1.26284000 | C | 0.05369900  | -1.05590200 | 4.26461200  |
| H | -7.96784000  | -5.55129600 | -1.25867800 | H | -0.89004900 | -1.35159800 | 3.78949800  |
| C | -6.00819700  | -7.09969100 | -1.41573200 | C | 0.69927700  | -1.93857600 | 5.13098800  |
| H | -5.88625800  | -6.01633400 | -1.67448700 | H | 0.27271600  | -2.92117400 | 5.31944300  |
| H | -6.31010600  | -7.64737700 | -2.32720100 | H | 2.40832200  | -2.25401400 | 6.41630700  |
| C | -4.75342900  | -7.69879100 | -0.78380700 | C | 2.43020400  | -0.29403700 | 5.51485200  |
| H | -4.98455600  | -8.23263900 | 0.15858000  | H | 3.36230700  | -0.00134100 | 5.99617200  |
| H | -4.22702700  | -8.38253700 | -1.47409400 | C | 1.79029100  | 0.59094000  | 4.64309500  |
| C | -2.69152800  | -6.88348400 | 0.20971300  | H | 2.22083800  | 1.57468700  | 4.45783000  |
| H | -2.09253800  | -7.60532600 | -0.37735700 | C | 2.00925800  | 1.85082300  | 1.81605900  |
| H | -2.95381700  | -7.33243000 | 1.18720100  | C | 2.71151200  | 2.95289900  | 2.33416800  |
| C | -1.95373600  | -5.55537300 | 0.36798500  | H | 2.17445600  | 3.69902900  | 2.91963300  |
| H | -0.86240700  | -5.70729500 | 0.48947700  | C | 4.07821300  | 3.09523000  | 2.12571500  |
| H | -2.12583400  | -4.87184800 | -0.48981500 | H | 4.61646100  | 3.93827800  | 2.58069600  |
| K | -5.37855100  | -4.44692600 | 0.83483100  | C | 4.77559300  | 2.13572500  | 1.34901000  |
| N | 11.72834300  | -1.66354400 | -0.54272800 | C | 4.06480200  | 1.01835000  | 0.84405500  |
| H | 11.04573100  | -0.90467800 | -0.86763600 | H | 4.60383200  | 0.26884200  | 0.24211300  |
| N | 10.57259300  | -3.04885400 | -2.07321800 | C | 2.70499400  | 0.88071800  | 1.08070800  |
| H | 9.97083800   | -2.20559400 | -2.24718500 | H | 2.17313900  | 0.01156300  | 0.69022400  |
| N | 7.74330600   | -3.50905000 | -2.20110600 | C | 7.04405900  | 3.20602100  | 1.58311500  |
| H | 8.04653900   | -2.92020100 | -1.30254700 | C | 9.36081800  | 3.69912900  | 1.97400900  |
| N | 5.82653300   | -2.13349700 | -2.37398000 | C | 9.20680500  | 4.66373300  | 2.99244300  |
| H | 6.28959700   | -1.44772400 | -1.71433100 | H | 8.23751400  | 4.75458900  | 3.48451500  |
| N | -6.07498900  | -2.11867700 | -1.01021100 | C | 10.25728700 | 5.51156100  | 3.34212700  |
| H | -6.43319300  | -1.26391600 | -0.49938800 | H | 10.11001400 | 6.24834100  | 4.12753300  |
| N | -8.31503700  | -2.58223400 | -1.45451500 | C | 11.48642100 | 5.42809000  | 2.68629400  |
| H | -8.50711500  | -0.78019300 | -1.40639300 | H | 12.29577500 | 6.10038400  | 2.94659000  |
| N | -10.63392300 | -2.48859100 | 0.11153800  | C | 11.67557100 | 4.46983100  | 1.68407800  |
| H | -9.82972800  | -1.80879200 | 0.21888700  | H | 12.62650700 | 4.40332400  | 1.15423300  |
| N | -11.40035600 | -1.55692800 | 2.12892900  | C | 11.15344000 | 2.91544400  | -0.98612800 |
| H | -10.57557400 | -0.91035400 | 2.01760300  | C | 11.34261300 | 1.83256500  | -3.24417300 |
| O | 12.16025900  | -3.94890800 | -0.63257000 | C | 12.07168500 | 2.86640100  | -3.85624300 |
| O | 6.07865900   | -3.99139700 | -3.74401600 | H | 12.38119000 | 3.73618000  | -3.27092400 |

|   |              |             |             |   |             |             |             |
|---|--------------|-------------|-------------|---|-------------|-------------|-------------|
| O | -6.62327800  | -4.11124700 | -2.06266900 | C | 12.39463200 | 2.77131600  | -5.21029700 |
| O | -12.55689000 | -3.31771900 | 1.13405900  | H | 12.95976300 | 3.57422400  | -5.67670600 |
| O | -2.47221600  | -4.98059300 | 1.59400300  | C | 12.00085400 | 1.66033200  | -5.96806100 |
| O | -3.93958000  | -2.58513300 | 2.56909100  | C | 11.26990200 | 0.63009200  | -5.34929000 |
| O | -6.85270200  | -2.96774800 | 2.92253800  | H | 10.95814000 | -0.23876000 | -5.92559600 |
| O | -8.12069700  | -4.92429900 | 1.12145500  | C | 10.93782900 | 0.70818400  | -4.00346100 |
| O | -7.05342200  | -7.28966500 | -0.42910200 | C | 12.35584400 | 1.57585900  | -7.42069600 |
| O | -3.88861100  | -6.56039500 | -0.53727700 | H | 13.44409200 | 1.59091400  | -7.56158300 |
| C | 10.63849600  | 3.60034000  | 1.33554600  | H | 11.98057300 | 0.65626400  | -7.88571600 |
| N | 10.88787800  | 2.57369100  | 0.35912000  | H | 11.93223200 | 2.41962800  | -7.98001000 |
| H | 10.36069900  | -0.09010400 | -3.51815600 | C | 1.88508300  | 3.61646600  | -1.44271300 |
| H | -10.86039800 | -0.38002000 | -1.11659400 | H | 2.13468800  | 3.02162000  | -0.53849000 |
| C | -9.84077300  | 4.30882700  | 2.55430800  | H | 0.78268100  | 3.69500100  | -1.53471000 |
| H | 12.16549200  | -2.99189300 | 3.63977200  | C | 2.49957500  | 3.02490300  | -2.70611000 |
| H | 10.18341000  | -2.64700100 | 1.83480000  | H | 2.64989400  | 3.78285900  | -3.49750500 |
| H | 6.89585800   | -3.40406000 | 0.50433000  | H | 1.85609800  | 2.20075000  | -3.10179900 |
| H | 5.26022200   | -3.60259900 | -0.25649300 | C | 4.51637800  | 1.88860500  | -3.40192000 |
| O | 9.46893300   | -0.40676600 | -1.48602900 | H | 3.99878400  | 0.96223800  | -3.72297700 |
| P | 8.41087000   | -0.61133800 | -0.36711400 | H | 4.56263100  | 2.60266800  | -4.24504300 |
| O | 8.33921900   | -2.11332000 | 0.00344100  | C | 5.89950300  | 1.58665600  | -2.83707500 |
| K | 7.45605000   | -3.60605500 | 3.68011100  | H | 6.42743700  | 0.82157100  | -3.44111000 |
| H | -3.71152800  | 0.29147700  | -2.92383100 | H | 5.88584800  | 1.23080800  | -1.77917500 |
| O | -8.22358600  | 0.20645400  | -1.24929300 | C | 7.97502200  | 2.77106300  | -2.44717900 |
| P | -8.10371000  | 0.60314400  | 0.37306600  | H | 8.53568500  | 2.04935600  | -3.07655600 |
| O | -9.28723800  | -0.15376400 | 1.02168100  | C | 8.51176200  | 4.19224000  | -2.59327900 |
| C | 10.65694600  | -3.59075600 | 2.19490000  | H | 8.10641800  | 4.70967300  | -3.48274400 |
| H | 11.47394200  | -3.87108800 | 1.48945500  | H | 9.62159300  | 4.20296000  | -2.63866900 |
| C | 11.18413500  | -3.50826400 | 3.62255500  | C | 8.85580300  | 6.03871400  | -1.05318700 |
| H | 11.28895300  | -4.51526600 | 4.07697100  | H | 8.74212900  | 6.81473600  | -1.83043700 |
| C | 10.35359000  | -1.41755400 | 4.56345400  | H | 9.92146900  | 5.71791500  | -0.97900800 |
| H | 11.40588600  | -1.09473700 | 4.44244500  | C | 8.32976200  | 6.49284600  | 0.30311200  |
| H | 10.01051000  | -1.18548500 | 5.59343300  | H | 9.08142700  | 7.10092600  | 0.83974000  |
| C | 9.46163200   | -0.75774800 | 3.51603600  | H | 8.04002800  | 5.63142800  | 0.94567500  |
| H | 9.71947000   | 0.31116600  | 3.36490900  | C | 6.21078800  | 7.32674500  | 1.12607500  |
| H | 9.49879900   | -1.25614300 | 2.51693700  | H | 6.08966700  | 6.29063800  | 1.53485500  |
| C | 7.14090200   | -0.09359300 | 3.32648200  | H | 6.58239400  | 7.98365000  | 1.93336100  |
| H | 7.00683600   | -0.53004100 | 2.31318500  | C | 4.91979900  | 7.86200900  | 0.50904200  |
| H | 7.49997600   | 0.95207000  | 3.21923000  | H | 5.08419700  | 8.24950900  | -0.51511900 |
| C | 5.87327700   | -0.16748400 | 4.17328900  | H | 4.45806400  | 8.64989800  | 1.13077600  |
| H | 6.09905000   | -0.04940800 | 5.25314600  | C | 2.75647200  | 6.97342700  | -0.15294400 |
| H | 5.14395500   | 0.60512600  | 3.85919100  | H | 2.21336300  | 7.74243200  | 0.42837600  |
| C | 4.28407200   | -1.66709800 | 3.09613900  | H | 2.91080200  | 7.33575900  | -1.18776100 |
| H | 3.64385000   | -0.76293600 | 3.01914400  | C | 2.02192800  | 5.63350100  | -0.11964700 |
| H | 3.68047700   | -2.50365600 | 3.50717600  | H | 0.92263000  | 5.77067100  | -0.13870800 |

|   |              |             |             |   |              |            |             |
|---|--------------|-------------|-------------|---|--------------|------------|-------------|
| C | 4.88567100   | -2.01356500 | 1.73656800  | H | 2.29359100   | 5.02585400 | 0.76845600  |
| H | 4.13106100   | -1.91173200 | 0.92756700  | K | 5.36010200   | 4.44879300 | -0.82137400 |
| H | 5.77272800   | -1.39315400 | 1.47408100  | O | -11.82044800 | 3.90963200 | 0.55247400  |
| C | 5.88919200   | -3.88949100 | 0.61051800  | O | -5.83861800  | 3.96543000 | 4.06283400  |
| C | -11.21107100 | 2.93941700  | 0.99884700  | O | 6.55823300   | 4.29430900 | 1.95571400  |
| N | -11.38092900 | 1.62582100  | 0.51541100  | O | 11.55317300  | 4.02701900 | -1.32939700 |
| C | -13.21971500 | 2.10694700  | -1.08723400 | O | 2.41991900   | 4.96283300 | -1.34114400 |
| C | -3.72826900  | 0.73919000  | 2.18209200  | O | 3.76200800   | 2.45682000 | -2.29591800 |
| C | -2.04294700  | 3.53837200  | -0.88275500 | O | 6.61156400   | 2.84551600 | -2.94415800 |
| H | -6.13323600  | 1.41867600  | 2.01292000  | O | 8.05566300   | 4.88722500 | -1.40671200 |
| H | -9.67351400  | 2.25282900  | 2.24282800  | O | 7.18896700   | 7.36254000 | 0.05791100  |
| O | -5.19635100  | 3.02451300  | -1.80081700 | O | 4.02592200   | 6.71902400 | 0.49306200  |

*Cartesian coordinates* (Å) for the optimized geometries of  $[\text{MV}]_2[(\text{HPO}_4)_4(\mathbf{L})_4]^{4-}$

|   |              |             |             |   |              |             |             |
|---|--------------|-------------|-------------|---|--------------|-------------|-------------|
| O | -7.73725800  | -1.59372600 | 2.21300700  | C | -10.17356500 | 4.43925100  | -1.51491800 |
| O | -7.27907100  | 0.87082200  | 2.60634800  | H | -10.05632000 | 5.29227200  | -0.84908900 |
| O | -8.39059800  | 0.11973200  | 0.39180700  | C | -10.85893900 | -0.37839200 | -1.70356900 |
| O | 11.42497200  | 1.70013500  | 2.24317700  | C | -10.63547200 | -2.72911300 | -1.04972400 |
| O | 7.03185700   | 5.03965800  | 0.27456800  | C | -11.75506500 | -3.14926200 | -1.78785500 |
| O | -5.80344700  | 5.00756200  | 1.60299000  | H | -12.42112900 | -2.39786100 | -2.19120000 |
| O | -11.54875700 | 1.58716500  | 1.65913400  | C | -12.00382000 | -4.49202000 | -2.02831600 |
| N | 10.61905300  | -0.01481400 | 0.92132900  | H | -12.87232900 | -4.77433800 | -2.61710000 |
| H | 9.84897800   | -0.16666300 | 0.24540200  | C | -11.16175300 | -5.46571000 | -1.49490000 |
| N | 10.58945500  | 2.12280500  | 0.15271800  | H | -11.35570100 | -6.52184100 | -1.65871500 |
| H | 10.33259800  | 1.69663900  | -0.73160600 | C | -10.08224000 | -5.07134100 | -0.71969200 |
| N | 8.56177400   | 3.73257400  | -0.84372800 | H | -9.42326400  | -5.81224900 | -0.28257100 |
| H | 8.61470700   | 2.81426200  | -1.30048200 | C | -9.78570000  | -3.72042800 | -0.50798800 |
| N | 6.35335700   | 3.47933600  | -1.28954900 | C | -7.44883300  | -4.04656700 | 0.12385400  |
| H | 6.74699900   | 2.67971300  | -1.82118800 | C | -5.16810800  | -3.63981300 | 0.93322400  |
| N | -5.31417600  | 2.77050500  | 1.93834000  | C | -4.45903700  | -4.27990000 | -0.10009100 |
| H | -5.77187300  | 1.88133000  | 2.18918900  | H | -4.98339700  | -4.96873000 | -0.74950200 |
| N | -7.46212700  | 3.44913000  | 1.98385300  | C | -3.10552700  | -4.03025800 | -0.27035000 |
| H | -7.56502200  | 2.42183600  | 2.09785500  | H | -2.58180200  | -4.51288100 | -1.09106400 |
| N | -9.73769700  | 2.20846100  | 2.92262200  | C | -2.39125500  | -3.17042900 | 0.57628200  |
| H | -8.83822100  | 1.81325300  | 3.20572600  | C | -3.07690900  | -2.64688500 | 1.68284000  |
| N | -10.43903900 | 0.01981500  | 2.91340600  | H | -2.54094700  | -2.03826800 | 2.40735200  |
| H | -9.54958200  | -0.16506400 | 3.36452900  | C | -4.43319200  | -2.87455700 | 1.86225400  |
| C | 11.34972400  | -4.77258800 | 4.02569600  | H | -4.94763100  | -2.46715100 | 2.73212500  |
| H | 10.45281800  | -4.99798400 | 4.61871100  | C | -0.96020800  | -2.87180500 | 0.35551600  |
| H | 12.19052400  | -4.70200800 | 4.72340400  | C | -0.12174100  | -2.88656700 | 1.58692600  |
| H | 11.52703400  | -5.63252800 | 3.37052900  | C | 0.54469700   | -1.73145900 | 2.01489400  |
| C | 11.18651500  | -3.50786200 | 3.22919400  | H | 0.50204200   | -0.83358700 | 1.40374600  |
| C | 11.69506500  | -2.28821900 | 3.67689000  | C | 1.24226100   | -1.71724300 | 3.22087800  |

|   |             |             |             |   |             |             |             |
|---|-------------|-------------|-------------|---|-------------|-------------|-------------|
| H | 12.24095600 | -2.25470700 | 4.61816800  | H | 1.71460000  | -0.79756600 | 3.55361400  |
| C | 11.54350500 | -1.10420900 | 2.95571600  | C | 1.32211400  | -2.87318200 | 3.99501600  |
| H | 11.96816300 | -0.17686800 | 3.31773400  | H | 1.86662100  | -2.86300700 | 4.93562200  |
| C | 10.85577200 | -1.12258900 | 1.73602600  | C | 0.67858500  | -4.03515600 | 3.56963800  |
| C | 10.34900900 | -2.34634900 | 1.27031100  | H | 0.72592600  | -4.93762900 | 4.17377100  |
| H | 9.83524800  | -2.36736300 | 0.31580200  | C | -0.05642800 | -4.03360200 | 2.38787800  |
| C | 10.51479500 | -3.51220000 | 2.00140200  | H | -0.59498200 | -4.92519200 | 2.07695000  |
| H | 10.13837000 | -4.44589300 | 1.58600400  | C | -0.39387400 | -2.61858400 | -0.85608200 |
| C | 10.93607200 | 1.28643500  | 1.18558000  | C | -1.14099400 | -2.39675800 | -2.11957400 |
| C | 10.74945600 | 3.51791800  | 0.18770500  | C | -0.62617900 | -2.90533700 | -3.32219100 |
| C | 11.89236300 | 4.11118800  | 0.72701000  | H | 0.30955300  | -3.45568600 | -3.30444700 |
| H | 12.68006700 | 3.46877700  | 1.10036000  | C | -1.29262700 | -2.72397700 | -4.52892100 |
| C | 11.99620600 | 5.49475000  | 0.80596600  | H | -0.87241500 | -3.13757200 | -5.44153400 |
| H | 12.88631600 | 5.94258900  | 1.23862100  | C | -2.48822400 | -2.01505300 | -4.56647200 |
| C | 10.97100200 | 6.29883800  | 0.31226200  | H | -3.01325200 | -1.86752200 | -5.50624300 |
| H | 11.05039400 | 7.38132400  | 0.35896100  | C | -3.00179200 | -1.48438200 | -3.38416800 |
| C | 9.84489300  | 5.71829000  | -0.25846800 | H | -3.93113400 | -0.92234400 | -3.41821200 |
| H | 9.03899000  | 6.33276200  | -0.64294500 | C | -2.33710800 | -1.66340000 | -2.17547500 |
| C | 9.71433300  | 4.32825100  | -0.31010200 | H | -2.73415900 | -1.23742100 | -1.25663400 |
| C | 7.29429500  | 4.16636400  | -0.55625500 | C | 1.08415300  | -2.69020300 | -1.01389100 |
| C | 4.99031200  | 3.42458900  | -1.05615300 | C | 1.87454400  | -1.59022600 | -1.36471100 |
| C | 4.31912800  | 4.11721400  | -0.03267000 | H | 1.41749600  | -0.60746900 | -1.45971900 |
| H | 4.86410400  | 4.83693200  | 0.56398600  | C | 3.23824800  | -1.72645300 | -1.57377200 |
| C | 2.97034200  | 3.88248500  | 0.19013900  | H | 3.84820700  | -0.85734300 | -1.79172400 |
| H | 2.47212500  | 4.40500100  | 1.00241000  | C | 3.86211400  | -2.98445900 | -1.48473100 |
| C | 2.23238100  | 2.97938400  | -0.58573700 | C | 3.06544800  | -4.10174000 | -1.18823200 |
| C | 2.88439200  | 2.37412300  | -1.66848900 | H | 3.51738900  | -5.08350000 | -1.17369300 |
| H | 2.32505200  | 1.72356000  | -2.33668600 | C | 1.70992800  | -3.93778700 | -0.93244800 |
| C | 4.23495700  | 2.58708300  | -1.90025000 | H | 1.10511900  | -4.81126600 | -0.69891500 |
| H | 4.71830700  | 2.13388100  | -2.76542600 | C | 6.07028400  | -4.08991200 | -1.32448800 |
| C | 0.80418900  | 2.70353900  | -0.31248000 | C | 8.51823800  | -4.51404000 | -1.25167400 |
| C | -0.07809200 | 2.80133100  | -1.50925000 | C | 8.49228700  | -5.77004900 | -0.63589500 |
| C | -0.77368300 | 1.68709800  | -1.99300100 | H | 7.53569300  | -6.17596200 | -0.33397100 |
| H | -0.71125900 | 0.74331100  | -1.45699100 | C | 9.66659200  | -6.49428700 | -0.45358100 |
| C | -1.52221800 | 1.77287100  | -3.16483300 | H | 9.62363900  | -7.47011400 | 0.02282000  |
| H | -2.01052200 | 0.88276800  | -3.55067800 | C | 10.87904500 | -5.97046300 | -0.88678700 |
| C | -1.62267900 | 2.98420300  | -3.84628400 | H | 11.80219600 | -6.52561800 | -0.74635800 |
| H | -2.20795400 | 3.04976500  | -4.75983300 | C | 10.91996400 | -4.73306200 | -1.51893000 |
| C | -0.94664200 | 4.10448400  | -3.36403800 | H | 11.85777900 | -4.31225500 | -1.85498800 |
| H | -1.00846700 | 5.05056300  | -3.89568500 | C | 9.75305800  | -3.98869100 | -1.71274700 |
| C | -0.16197400 | 4.00541300  | -2.21945400 | C | 10.80430500 | -1.82894500 | -2.29339500 |
| H | 0.39919500  | 4.86641400  | -1.86518600 | C | 11.16152500 | 0.57632400  | -2.80533500 |
| C | 0.28148400  | 2.41805900  | 0.91029200  | C | 10.51214200 | 1.73378800  | -3.26808300 |
| C | 1.06900200  | 2.18049900  | 2.14778200  | H | 9.48551300  | 1.66377600  | -3.61439900 |

|   |              |             |            |   |             |             |             |
|---|--------------|-------------|------------|---|-------------|-------------|-------------|
| C | 2.34441200   | 1.58924900  | 2.14994700 | C | 11.15064500 | 2.96452300  | -3.22558600 |
| H | 2.77425300   | 1.26104900  | 1.20721900 | H | 10.61489800 | 3.84701400  | -3.56973400 |
| C | 3.05653500   | 1.43777200  | 3.33463900 | C | 12.45259000 | 3.09688300  | -2.73244100 |
| H | 4.05216700   | 1.00277300  | 3.31972200 | C | 13.08636300 | 1.93709200  | -2.28910900 |
| C | 2.50837200   | 1.83709400  | 4.55265300 | H | 14.09771500 | 2.00404700  | -1.89309400 |
| H | 3.07133400   | 1.71408300  | 5.47381100 | C | 12.46954500 | 0.68861000  | -2.31950200 |
| C | 1.23147800   | 2.38645900  | 4.57218700 | H | 12.97760000 | -0.19232800 | -1.95235100 |
| H | 0.78163900   | 2.69384500  | 5.51219900 | C | 13.11394200 | 4.44396200  | -2.66385600 |
| C | 0.52370400   | 2.55400800  | 3.38684900 | H | 14.11405400 | 4.37476300  | -2.22457400 |
| H | -0.46882100  | 2.99193900  | 3.41679800 | H | 13.21637500 | 4.89211000  | -3.65994800 |
| C | -1.19432300  | 2.47769900  | 1.10397400 | H | 12.52851900 | 5.13767600  | -2.04877900 |
| C | -1.97349200  | 1.35532000  | 1.40511600 | N | 8.07211600  | 2.38053800  | 2.68071800  |
| H | -1.51394400  | 0.37008100  | 1.43475000 | N | 4.87998500  | -3.76277300 | 1.69586200  |
| C | -3.33003800  | 1.47490400  | 1.65903700 | C | 8.78532600  | 3.64343500  | 2.92628000  |
| H | -3.93084800  | 0.59203300  | 1.84800300 | H | 9.85553200  | 3.46036000  | 2.80536400  |
| C | -3.95702600  | 2.73447400  | 1.66769200 | H | 8.45076500  | 4.38337500  | 2.19627000  |
| C | -3.17661100  | 3.86953600  | 1.39604500 | H | 8.56523800  | 3.98245000  | 3.94207400  |
| H | -3.63226200  | 4.84890500  | 1.44984200 | C | 6.88633400  | 2.39105000  | 2.03937300  |
| C | -1.82655700  | 3.72429600  | 1.09968600 | H | 6.51732300  | 3.36336600  | 1.73134500  |
| H | -1.23125500  | 4.61133200  | 0.89502100 | C | 6.22469000  | 1.21855900  | 1.75564500  |
| C | -6.16821500  | 3.85168700  | 1.83874000 | H | 5.31818900  | 1.27164800  | 1.16851700  |
| C | -8.61174200  | 4.22489400  | 2.11218400 | C | 6.79224600  | -0.00764400 | 2.12100100  |
| C | -8.66573200  | 5.58987800  | 1.80605800 | C | 7.98597000  | 0.02147600  | 2.84855200  |
| H | -7.75334000  | 6.08905300  | 1.50635700 | H | 8.48083600  | -0.88478200 | 3.17820100  |
| C | -9.86823400  | 6.28258800  | 1.89866200 | C | 8.61377200  | 1.22010000  | 3.09884500  |
| H | -9.89186900  | 7.34179000  | 1.65613900 | H | 9.58995800  | 1.28103800  | 3.56630800  |
| C | -11.02929100 | 5.62696200  | 2.29765200 | C | 6.12725800  | -1.29740900 | 1.85013400  |
| H | -11.97174600 | 6.16254300  | 2.36364900 | C | 4.73963000  | -1.40231900 | 1.74502400  |
| C | -10.97772200 | 4.28019900  | 2.63728000 | H | 4.09373400  | -0.53545700 | 1.74465300  |
| H | -11.86907800 | 3.75551000  | 2.96091400 | C | 4.13867500  | -2.64240000 | 1.66937900  |
| C | -9.78261700  | 3.56595600  | 2.55510900 | H | 3.06377100  | -2.76270500 | 1.60934200  |
| C | -10.63686700 | 1.28555600  | 2.43220000 | C | 6.23025300  | -3.69214500 | 1.69521200  |
| C | -11.16985000 | -1.12926800 | 2.56854100 | H | 6.76337000  | -4.63229100 | 1.61596900  |
| C | -10.61937300 | -2.36988900 | 2.91429000 | C | 6.87519000  | -2.48071400 | 1.76463500  |
| H | -9.63731400  | -2.40379300 | 3.37573800 | H | 7.95900700  | -2.46112500 | 1.72576500  |
| C | -11.29943400 | -3.54568800 | 2.62871400 | C | 4.23539300  | -5.07934800 | 1.73265400  |
| H | -10.84253600 | -4.49588800 | 2.89769800 | H | 3.16023900  | -4.94791600 | 1.61631500  |
| C | -12.54325700 | -3.53532100 | 1.99413900 | H | 4.63431700  | -5.66747600 | 0.90487600  |
| C | -13.08304800 | -2.29079900 | 1.66826100 | H | 4.45040600  | -5.54623000 | 2.69691400  |
| H | -14.05350200 | -2.24458600 | 1.17796200 | N | -7.72676300 | -2.57134200 | -3.00480500 |
| C | -12.42433600 | -1.09847700 | 1.94796200 | N | -5.31639300 | 3.74385300  | -1.31147200 |
| H | -12.87009300 | -0.14966400 | 1.68396700 | C | -8.25194100 | -3.86248300 | -3.47215100 |
| C | -13.25048200 | -4.81226300 | 1.63937400 | H | -7.99164100 | -4.61728400 | -2.72749400 |
| H | -14.33758400 | -4.67850100 | 1.62895500 | H | -7.81636400 | -4.09176200 | -4.44841300 |



|   |              |             |             |   |              |             |             |
|---|--------------|-------------|-------------|---|--------------|-------------|-------------|
| H | -13.01510100 | -5.61183600 | 2.35016300  | H | -9.33793300  | -3.79148700 | -3.54300900 |
| H | -12.94981700 | -5.15833300 | 0.64279400  | C | -6.53400600  | -2.52494400 | -2.37358400 |
| O | 7.74761800   | 1.28373300  | -2.00705600 | H | -6.02601400  | -3.46891800 | -2.23325300 |
| O | 7.34125400   | -1.20616800 | -2.46031000 | C | -6.03923400  | -1.33976500 | -1.88089400 |
| O | 8.17671600   | -0.48564000 | -0.15006400 | H | -5.12344300  | -1.36408900 | -1.30630700 |
| O | -11.17472600 | -0.57495300 | -           | C | -6.75873700  | -0.15397800 | -2.06647300 |
|   | 2.88045500   |             |             | C | -7.96724700  | -0.23088000 | -2.75713700 |
| O | -7.19517000  | -4.87552500 | -0.75636200 | H | -8.57154500  | 0.65068600  | -2.94607100 |
| O | 5.66922900   | -5.18633400 | -0.92168000 | C | -8.44140100  | -1.45014300 | -3.19345700 |
| O | 11.91023600  | -2.06959500 | -1.83475300 | H | -9.42675000  | -1.54491300 | -3.63922500 |
| N | -10.86389300 | 0.85962900  | -1.12391100 | C | -6.24113900  | 1.16481100  | -1.65930700 |
| H | -10.85094600 | 0.90277700  | -0.10599500 | C | -4.87588200  | 1.45488300  | -1.71114400 |
| N | -10.40321900 | -1.36585200 | -           | H | -4.13219000  | 0.69633000  | -1.92094900 |
|   | 0.84731700   |             |             | C | -4.43695200  | 2.74928000  | -1.53196700 |
| H | -9.69917400  | -1.03189000 | -0.16741400 | H | -3.38874200  | 3.01722800  | -1.58688800 |
| N | -8.64063000  | -3.37966600 | 0.23731300  | C | -6.63365000  | 3.47825800  | -1.16111700 |
| H | -8.67456400  | -2.64223200 | 0.95550800  | H | -7.27845200  | 4.31436600  | -0.91494800 |
| N | -6.54232300  | -3.66314300 | 1.08959500  | C | -7.12015300  | 2.20141500  | -1.31887000 |
| H | -6.91676400  | -2.92509800 | 1.72645900  | H | -8.17061400  | 2.00879700  | -1.13816100 |
| N | 5.23247500   | -3.05053400 | -1.68876300 | C | -4.85700700  | 5.13620200  | -1.25352600 |
| H | 5.70477500   | -2.19735200 | -2.01131100 | H | -5.23002200  | 5.57593000  | -0.32638000 |
| N | 7.37654400   | -3.72195100 | -1.42060300 | H | -5.23511200  | 5.66562800  | -2.13156800 |
| H | 7.50370400   | -2.73053900 | -1.68743800 | H | -3.76738500  | 5.14470400  | -1.25341800 |
| N | 9.76435100   | -2.74093200 | -2.34455800 | P | 7.39794700   | -0.08223400 | -1.39888800 |
| H | 8.86941600   | -2.33488000 | -2.62038300 | P | -7.45809700  | -0.23800600 | 1.54429800  |
| N | 10.43172600  | -0.61652700 | -2.83713700 | O | 5.82187200   | 0.05698900  | -0.84211200 |
| H | 9.45440100   | -0.51260900 | -3.09559100 | H | 5.36964700   | 0.76174600  | -1.32745400 |
| C | -9.62181300  | 5.92418300  | -3.48655500 | O | -5.95458100  | -0.36694900 | 0.81722100  |
| H | -9.12630700  | 5.81397900  | -4.45720500 | H | -5.41882400  | -1.02340000 | 1.28745600  |
| H | -10.51374400 | 6.54371900  | -3.64575900 | C | -10.67450000 | 2.08127600  | -1.77205000 |
| H | -8.95484400  | 6.49162700  | -2.82701100 | C | -10.51568300 | 3.21512600  | -0.95958200 |
| C | -9.97998800  | 4.58968500  | -2.89305300 | H | -10.66376600 | 3.12283600  | 0.11138900  |
| C | -10.18415300 | 3.46525400  | -3.69341700 | H | -10.73274100 | 1.38089500  | -3.80767500 |
| H | -10.07471100 | 3.55339200  | -4.77300600 |   |              |             |             |
| C | -10.54105900 | 2.22790400  | -3.16073500 |   |              |             |             |

## References

1. X.-F. Duan, J. Zeng, J.-W. Lü and Z.-B. Zhang, *J. Org. Chem.*, 2006, **71**, 9873-9876.
2. G. M. Sheldrick, *University of Göttingen, Germany*, 1996.
3. L. J. B. O. V. Dolomanov, R. J. Gildea, J. A. K. Howard and H. Puschmann, *J. Appl. Cryst.*, 2009, **42**, 339-341.
4. a) J. Zhao, D. Yang, Y. Zhao, X.-J. Yang, Y.-Y. Wang and B. Wu, *Angew. Chem. Int. Ed.*, 2014, **53**, 6632-6636; b) S. Li, C. Jia, B. Wu, Q. Luo, X. Huang, Z. Yang, Q.-S. Li and X.-J. Yang, *Angew. Chem. Int. Ed.*, 2011, **50**, 5721-5724.
5. P. Kuzmič, *Anal. Biochem.*, 1996, **237**, 260-273.
6. a) J. Hostaš, J. Řezáč and P. Hobza, *Chem. Phys. Lett.*, **2013**, 568-569, 161-166; b) S. Grimme, J. Antony, S. Ehrlich and H. Krieg, *J. Chem. Phys.*, 2010, **132**, 154104.
7. Gaussian 09, rev. D.01 (Gaussian Inc., 2013).
